# Supplementary material
Source: publisher figshare collection journal article supplement (https://acs.figshare.com/ndownloader/files/3858397)
Supplement: Supplementary file 1 [file 3858397]

## Supporting Information

### Extraction of Phenols from Water with Functionalized Ionic Liquids

Yunchang Fan, Yun Li, Xing Dong, Guitao Hu, Shaofeng Hua, Juan Miao\*, Dongdong Zhou

*College of Physics and Chemistry, Henan Polytechnic University, Jiaozuo, China*

\*Corresponding author.

E-mail address: juanmiao2013@163.com

Tel.: +863913987823, Fax: +863913987815.

#### I. Synthesis of ILs

##### 1. [C<sub>4</sub>C<sub>7</sub>im]PF<sub>6</sub>

1-Bromoheptane (0.2 mol) was added dropwise to N-butylimidazole (0.2 mol) under 50 °C over 20 min and then the mixture was kept at 70 °C for 10 h under stirring; the resultant sticky product ([C<sub>4</sub>C<sub>7</sub>im]Br) was dissolved with 30 mL of water, followed by the addition of 0.2 mol of KPF<sub>6</sub>. After stirring for 1 h, two phases formed where the bottom phase was [C<sub>4</sub>C<sub>7</sub>im]PF<sub>6</sub>; after decanting the top phase, 10 mL of water was added to wash the IL phase; this was repeated several times until Br<sup>-</sup> free, as indicated by the AgNO<sub>3</sub> test of the water washings. After vacuum drying 24 h at 75 °C, [C<sub>4</sub>C<sub>7</sub>im]PF<sub>6</sub> was obtained as a light yellow liquid (90% yield).

##### 2. [C<sub>4</sub>C<sub>7</sub>im]BF<sub>4</sub>

This synthesis followed the same procedure as for [C<sub>4</sub>C<sub>7</sub>im]PF<sub>6</sub> described above, although NaBF<sub>4</sub> was used instead of KPF<sub>6</sub>; [C<sub>4</sub>C<sub>7</sub>im]BF<sub>4</sub> was a light yellow liquid and the yield was 79%.

##### 3. [C<sub>4</sub>C<sub>7</sub>im]NTf<sub>2</sub>

As for the preparation of [C<sub>4</sub>C<sub>7</sub>im]PF<sub>6</sub> except LiNTf<sub>2</sub> was employed to afford [C<sub>4</sub>C<sub>7</sub>im]NTf<sub>2</sub> as a light yellow liquid (92% yield).

#### 4. [C<sub>4</sub>C<sub>6</sub>OHim]PF<sub>6</sub>

N-Butylimidazole (0.2mol) was mixed with 6-chloro-1-hexanol (0.2mol); this mixture was stirred at 70 °C for 10 h, the resulting sticky product ([C<sub>4</sub>C<sub>6</sub>OHim]Cl) was dissolved with 30 mL of water, followed by the addition of 0.2 mol of KPF<sub>6</sub>. After stirring for 1 h, two phases formed where the bottom phase was [C<sub>4</sub>C<sub>6</sub>OHim]PF<sub>6</sub>; after decanting the top phase, 10 mL of water was added to wash the IL phase; this was repeated several times until Cl<sup>-</sup> free, as indicated by the AgNO<sub>3</sub> test of the water washings. After vacuum drying 24 h at 75 °C, [C<sub>4</sub>C<sub>6</sub>OHim]PF<sub>6</sub> was obtained as a light yellow liquid (70% yield).

#### 5. [C<sub>4</sub>C<sub>6</sub>OHim]BF<sub>4</sub>

Briefly, 0.2 mol of [C<sub>4</sub>C<sub>6</sub>OHim]Cl (following the same synthesis procedure described above), was dissolved with 30 mL of water, and then 0.4 mol of NaBF<sub>4</sub> was added; the mixture was stirred for 2 h and two phases formed. The upper phase was [C<sub>4</sub>C<sub>6</sub>OHim]BF<sub>4</sub>, after phase separation with a separatory funnel (100 mL), [C<sub>4</sub>C<sub>6</sub>OHim]BF<sub>4</sub> was dissolved with 20 mL of dichloromethane and washed with aliquots of water until Cl<sup>-</sup> free, as indicated by the AgNO<sub>3</sub> test of the water washings. After vacuum drying 24 h at 75 °C, [C<sub>4</sub>C<sub>6</sub>OHim]BF<sub>4</sub> was obtained as a light yellow liquid (15% yield).

#### 6. [C<sub>4</sub>C<sub>6</sub>OHim]NTf<sub>2</sub>

As for the preparation of [C<sub>4</sub>C<sub>6</sub>OHim]PF<sub>6</sub> except LiNTf<sub>2</sub> was employed to afford [C<sub>4</sub>C<sub>6</sub>OHim]NTf<sub>2</sub> as a light yellow liquid (85% yield).

#### 7. [C<sub>4</sub>C<sub>8</sub>OHim]PF<sub>6</sub>

As for the preparation of [C<sub>4</sub>C<sub>6</sub>OHim]PF<sub>6</sub> except 8-chloro-1-octanol was employed to afford [C<sub>4</sub>C<sub>8</sub>OHim]PF<sub>6</sub> as a light yellow liquid (82% yield).

#### 8. [C<sub>4</sub>C<sub>8</sub>OHim]BF<sub>4</sub>

As for the preparation of [C<sub>4</sub>C<sub>8</sub>OHim]PF<sub>6</sub> except NaBF<sub>4</sub> was employed to afford [C<sub>4</sub>C<sub>8</sub>OHim] BF<sub>4</sub> as a light yellow liquid (61% yield).

### 9. [C<sub>4</sub>C<sub>8</sub>OHim]NTf<sub>2</sub>

As for the preparation of [C<sub>4</sub>C<sub>8</sub>OHim]PF<sub>6</sub> except LiNTf<sub>2</sub> was employed to afford [C<sub>4</sub>C<sub>8</sub>OHim]NTf<sub>2</sub> as a light yellow liquid (86% yield).

### 10. [C<sub>4</sub>C<sub>9</sub>im]PF<sub>6</sub>

As for the preparation of [C<sub>4</sub>C<sub>6</sub>OHim]PF<sub>6</sub> except 1-chlorononane was used to react with equal molar amount (0.2 mol) of N-butylimidazole to afford [C<sub>4</sub>C<sub>9</sub>im]PF<sub>6</sub> as a colorless liquid (91% yield).

### 11. [C<sub>4</sub>C<sub>9</sub>im]BF<sub>4</sub>

As for the preparation of [C<sub>4</sub>C<sub>9</sub>im]PF<sub>6</sub> except NaBF<sub>4</sub> was employed to afford [C<sub>4</sub>C<sub>9</sub>im]BF<sub>4</sub> as a colorless liquid (83% yield).

### 12. [C<sub>4</sub>C<sub>9</sub>im]NTf<sub>2</sub>

As for the preparation of [C<sub>4</sub>C<sub>9</sub>im]PF<sub>6</sub> except LiNTf<sub>2</sub> was employed to afford [C<sub>4</sub>C<sub>9</sub>im]NTf<sub>2</sub> as a colorless liquid (95% yield).

### 13. [C<sub>4</sub>C<sub>12</sub>im]PF<sub>6</sub>

As for the preparation of [C<sub>4</sub>C<sub>9</sub>im]PF<sub>6</sub> except 1-chlorododecane was employed to afford [C<sub>4</sub>C<sub>12</sub>im]PF<sub>6</sub> as a colorless liquid (92% yield).

### 14. [C<sub>4</sub>C<sub>12</sub>im]BF<sub>4</sub>

As for the preparation of [C<sub>4</sub>C<sub>12</sub>im]PF<sub>6</sub> except NaBF<sub>4</sub> was employed to afford [C<sub>4</sub>C<sub>12</sub>im]BF<sub>4</sub> as a colorless liquid (90% yield).

### 15. [C<sub>4</sub>C<sub>12</sub>im]NTf<sub>2</sub>

As for the preparation of [C<sub>4</sub>C<sub>12</sub>im]PF<sub>6</sub> except LiNTf<sub>2</sub> was employed to afford [C<sub>4</sub>C<sub>12</sub>im]NTf<sub>2</sub> as a colorless liquid (96% yield).

### 16. [C<sub>4</sub>C<sub>11</sub>OHim]PF<sub>6</sub>

Briefly, 0.2 mol of 11-bromo-1-undecanol was dissolved with 40 mL of acetonitrile, and then 0.2 mol of

N-butylimidazole was added; this mixture was stirred at 70 °C for 12 h. After removing acetonitrile under reduced pressure evaporation, the resulting product ( $[\text{C}_4\text{C}_{11}\text{OHim}]\text{Br}$ ) was dissolved with 30 mL of water, followed by the addition of 0.2 mol of  $\text{KPF}_6$ ; After stirring for 1 h, two phases formed where the bottom phase was  $[\text{C}_4\text{C}_{11}\text{OHim}]\text{PF}_6$ ; after decanting the top phase, 10 mL of water was added to wash the IL phase; this was repeated several times until  $\text{Br}^-$  free, as indicated by the  $\text{AgNO}_3$  test of the water washings. After vacuum drying 24 h at 75 °C,  $[\text{C}_4\text{C}_{11}\text{OHim}]\text{PF}_6$  was obtained as a light yellow liquid (91% yield).

#### 17. $[\text{C}_4\text{C}_{11}\text{OHim}]\text{BF}_4$

As for the preparation of  $[\text{C}_4\text{C}_{11}\text{OHim}]\text{PF}_6$  except  $\text{NaBF}_4$  was employed to afford  $[\text{C}_4\text{C}_{11}\text{OHim}]\text{BF}_4$  as a light yellow liquid (89% yield).

#### 18. $[\text{C}_4\text{C}_{11}\text{OHim}]\text{NTf}_2$

As for the preparation of  $[\text{C}_4\text{C}_{11}\text{OHim}]\text{PF}_6$  except  $\text{LiNTf}_2$  was employed to afford  $[\text{C}_4\text{C}_{11}\text{OHim}]\text{NTf}_2$  as a light yellow liquid (92% yield).

#### 19. $[\text{C}_4\text{Beim}]\text{PF}_6$

Briefly, 0.2 mol of N-benzylimidazole was dissolved with 40 mL of acetonitrile, and then 0.2 mol of 1-bromobutane was added; this mixture was stirred at 70 °C for 12 h. After removing acetonitrile under reduced pressure evaporation, the resulting product ( $[\text{C}_4\text{Beim}]\text{Br}$ ) was dissolved with 30 mL of water, followed by the addition of 0.2 mol of  $\text{KPF}_6$ . After stirring for 1 h at 60 °C, two phases formed where the bottom phase was  $[\text{C}_4\text{Beim}]\text{PF}_6$ ; after decanting the top phase, 10 mL of hot water (60 °C) was added to wash the IL phase; this was repeated several times until  $\text{Br}^-$  free, as indicated by the  $\text{AgNO}_3$  test of the water washings. After vacuum drying 24 h at 75 °C,  $[\text{C}_4\text{Beim}]\text{PF}_6$  was obtained as a light yellow solid (melting point: 48 – 50 °C, 85 % yield).

#### 20. $[\text{C}_4\text{Beim}]\text{BF}_4$

As for the preparation of  $[\text{C}_4\text{Beim}]\text{PF}_6$  except  $\text{NaBF}_4$  was employed and the ion exchange of  $[\text{C}_4\text{Beim}]\text{Br}$

and NaBF<sub>4</sub> and the IL phase washing process were conducted at room temperature; [C<sub>4</sub>Beim]BF<sub>4</sub> was a light yellow liquid (62% yield).

## **21. [C<sub>4</sub>Beim]NTf<sub>2</sub>**

As for the preparation of [C<sub>4</sub>Beim]BF<sub>4</sub> except LiNTf<sub>2</sub> was employed to afford [C<sub>4</sub>Beim]NTf<sub>2</sub> as a light yellow liquid (87% yield).

## **II. Characterization of the Synthesized ILs.**

All the synthesized ILs were characterized with NMR spectra (Bruker, AV-400, Karlsruhe, Germany) and elemental analysis (FLASH 2000 analyzer, Thermo Fisher Scientific, Belmont, MA, USA), the identification of signals of solvent residue and trace water in solvent was referred to the Fulmer's work (Fulmer, G. R.; Miller, A. J. M.; Sherden, N. H.; Gottlieb, H. E.; Nudelman, A.; Stoltz, B. M.; Bercaw, J. E.; Goldberg, K. I. NMR Chemical Shifts of Trace Impurities: Common Laboratory Solvents, Organics, and Gases in Deuterated Solvents Relevant to the Organometallic Chemist. *Organometallics* **2010**, 29, 2176.).

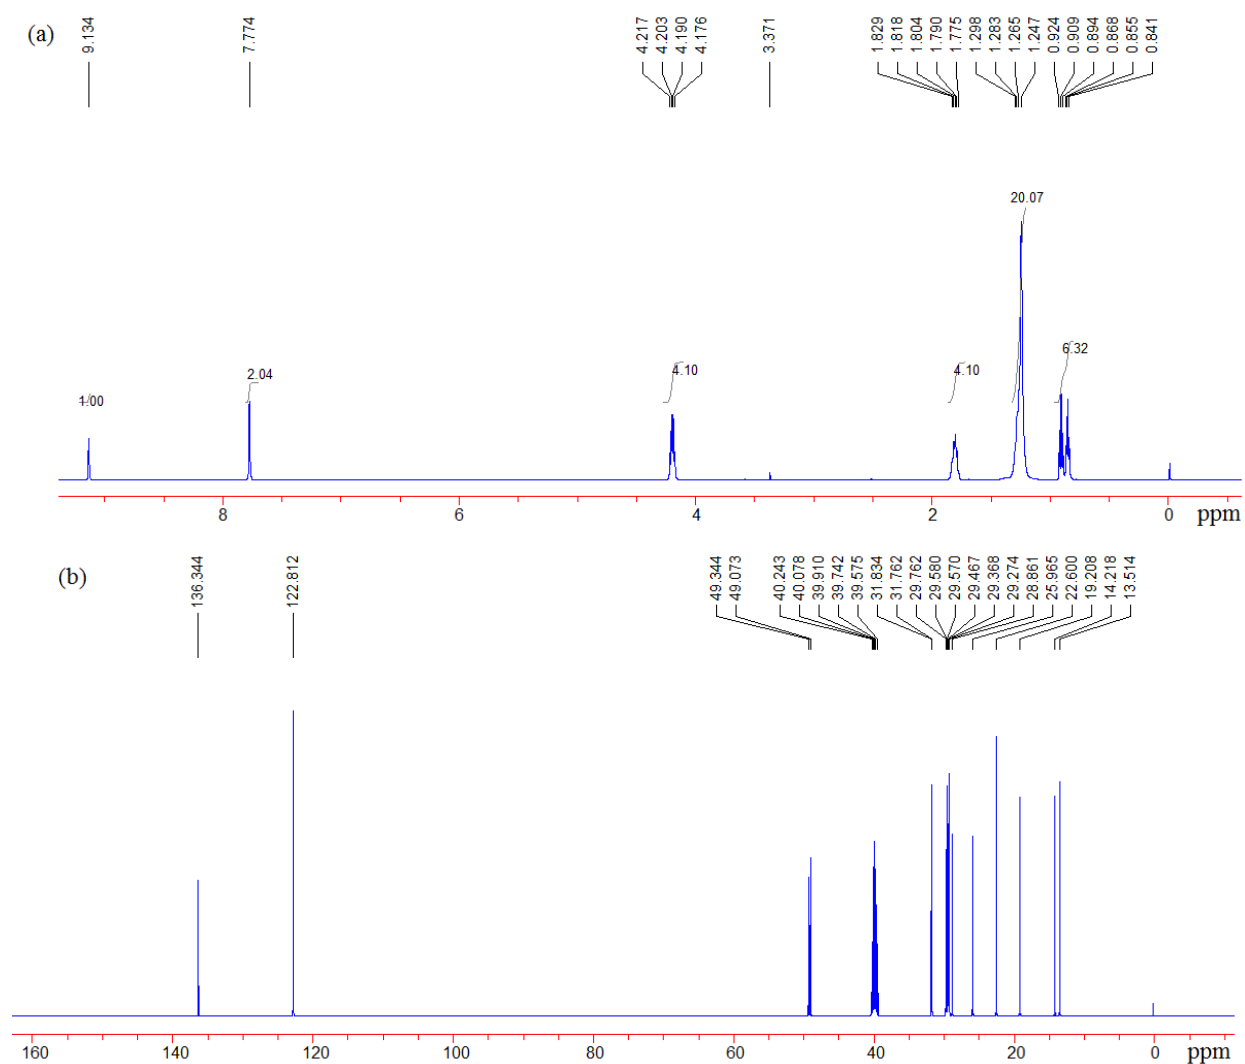

**Fig. S1** <sup>1</sup>H NMR (a) and <sup>13</sup>C NMR (b) spectra of [C<sub>4</sub>C<sub>12</sub>im]PF<sub>6</sub>; solvent: (CD<sub>3</sub>)<sub>2</sub>SO.

<sup>1</sup>H NMR: 0.841-0.924 (6H, m), 1.247-1.298 (20H, m), 1.775-1.829 (4H, m), 3.371 (signal of trace water in solvent), 4.176-4.217 (4H, m), 7.774 (2H, s), 9.134 (1H, s);

<sup>13</sup>C NMR: 13.514, 14.218, 19.208, 22.600, 25.965, 28.861, 29.274, 29.368, 29.467, 29.570, 29.580, 29.762, 31.762, 31.834, 49.073, 49.344, 122.812, 136.344.

Elemental analysis (% , calc.): C 52.2 (52.1), H 8.4 (8.5), N 6.4 (6.4).

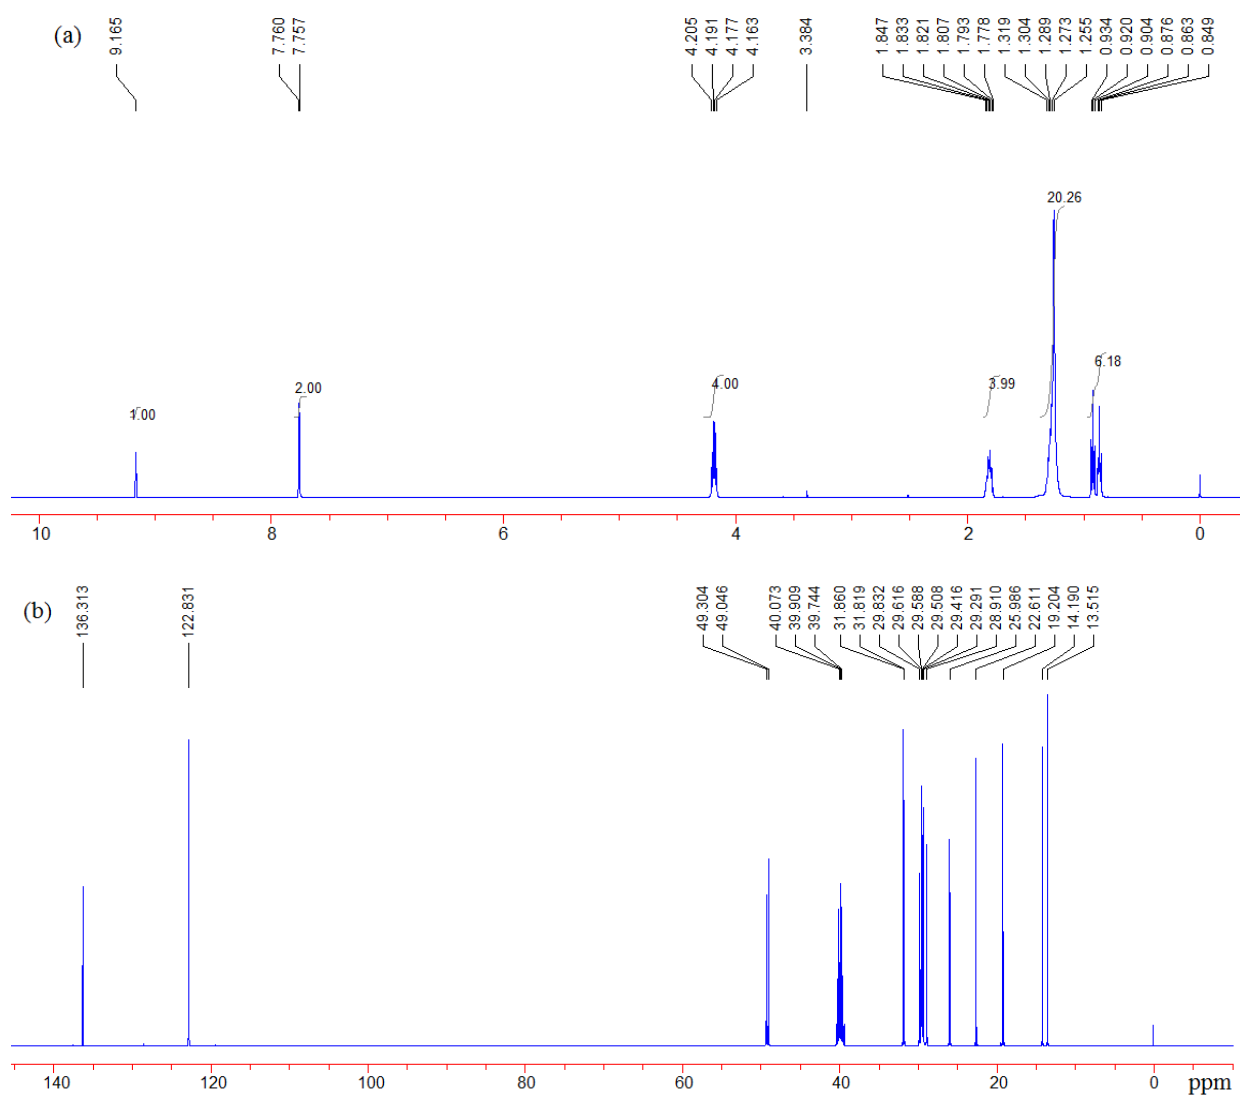

**Fig. S2** <sup>1</sup>H NMR (a) and <sup>13</sup>C NMR (b) spectra of [C<sub>4</sub>C<sub>12</sub>im]BF<sub>4</sub>; solvent: (CD<sub>3</sub>)<sub>2</sub>SO.

<sup>1</sup>H NMR: 0.849-0.934 (6H, m), 1.255-1.319 (20H, m), 1.778-1.847 (4H, m), 3.384 (signal of trace water in solvent), 4.163-4.205 (4H, m), 7.757-7.760 (2H, d), 9.165 (1H, s);

<sup>13</sup>C NMR: 13.515, 14.190, 19.204, 22.611, 25.986, 28.910, 29.291, 29.416, 29.508, 29.588, 29.616, 29.832, 31.819, 31.860, 49.046, 49.304, 122.831, 136.313.

Elemental analysis (% , calc.): C 60.2 (60.0), H 9.8 (9.8), N 7.3 (7.4).

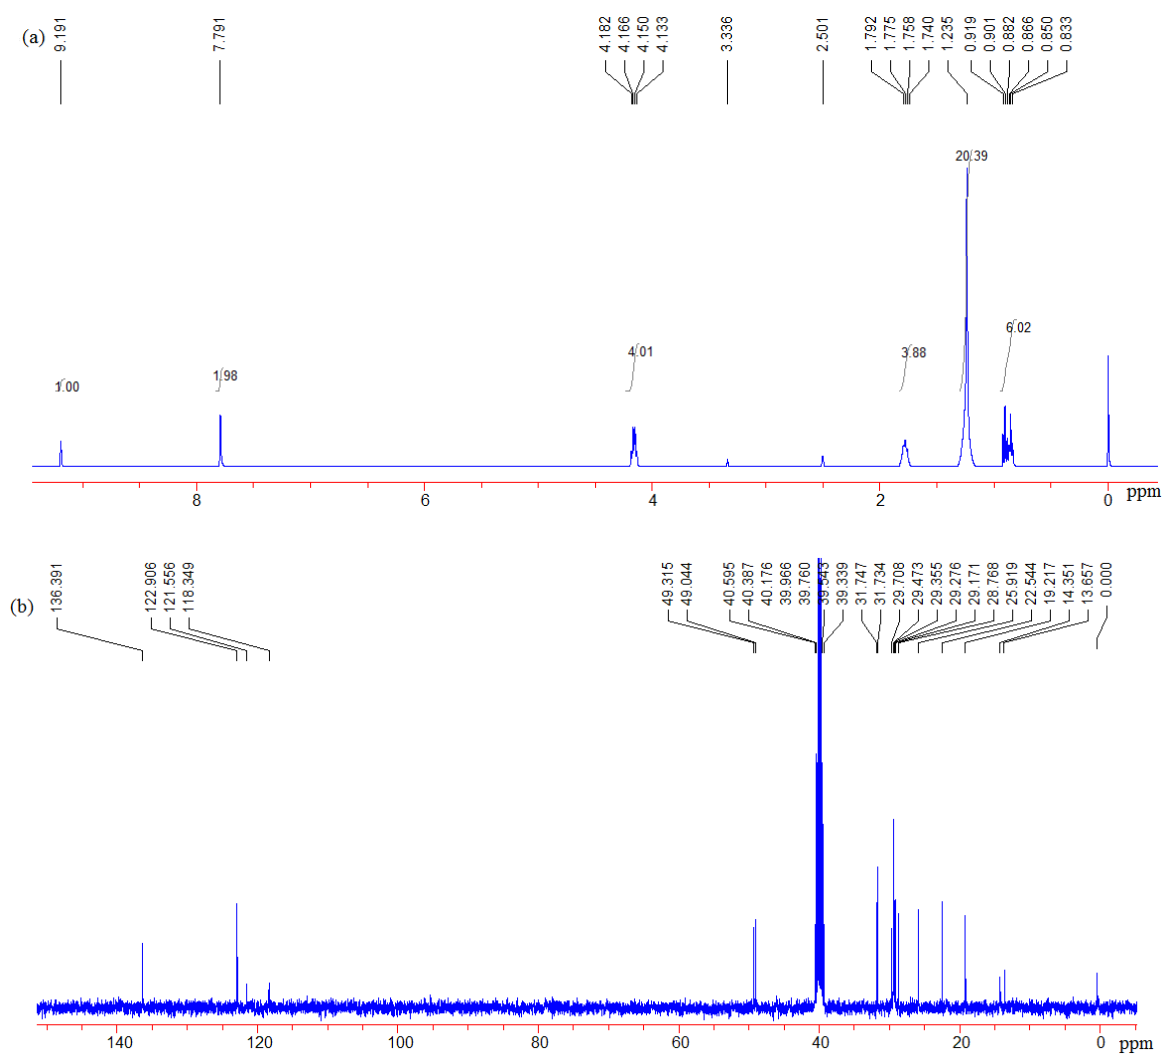

**Fig. S3**  $^1\text{H}$ NMR (a) and  $^{13}\text{C}$ NMR (b) spectra of  $[\text{C}_4\text{C}_{12}\text{im}]\text{NTf}_2$ ; solvent:  $(\text{CD}_3)_2\text{SO}$ .

$^1\text{H}$ NMR: 0.833-0.919 (6H, m), 1.235 (20H, s), 1.740-1.792 (4H, m), 2.501 (solvent residual signal), 3.336 (signal of trace water in solvent), 4.133-4.182 (4H, m), 7.791 (2H, s), 9.191 (1H, s);

$^{13}\text{C}$ NMR: 13.657, 14.351, 19.217, 22.544, 25.919, 28.768, 29.171, 29.276, 29.355, 29.473, 29.708, 31.734, 31.747, 49.044, 49.315, 118.349, 121.556, 122.906, 136.391.

Elemental analysis (% , calc.): C 44.5 (44.0), H 6.4 (6.5), N 7.2 (7.3), S 11.4 (11.2).



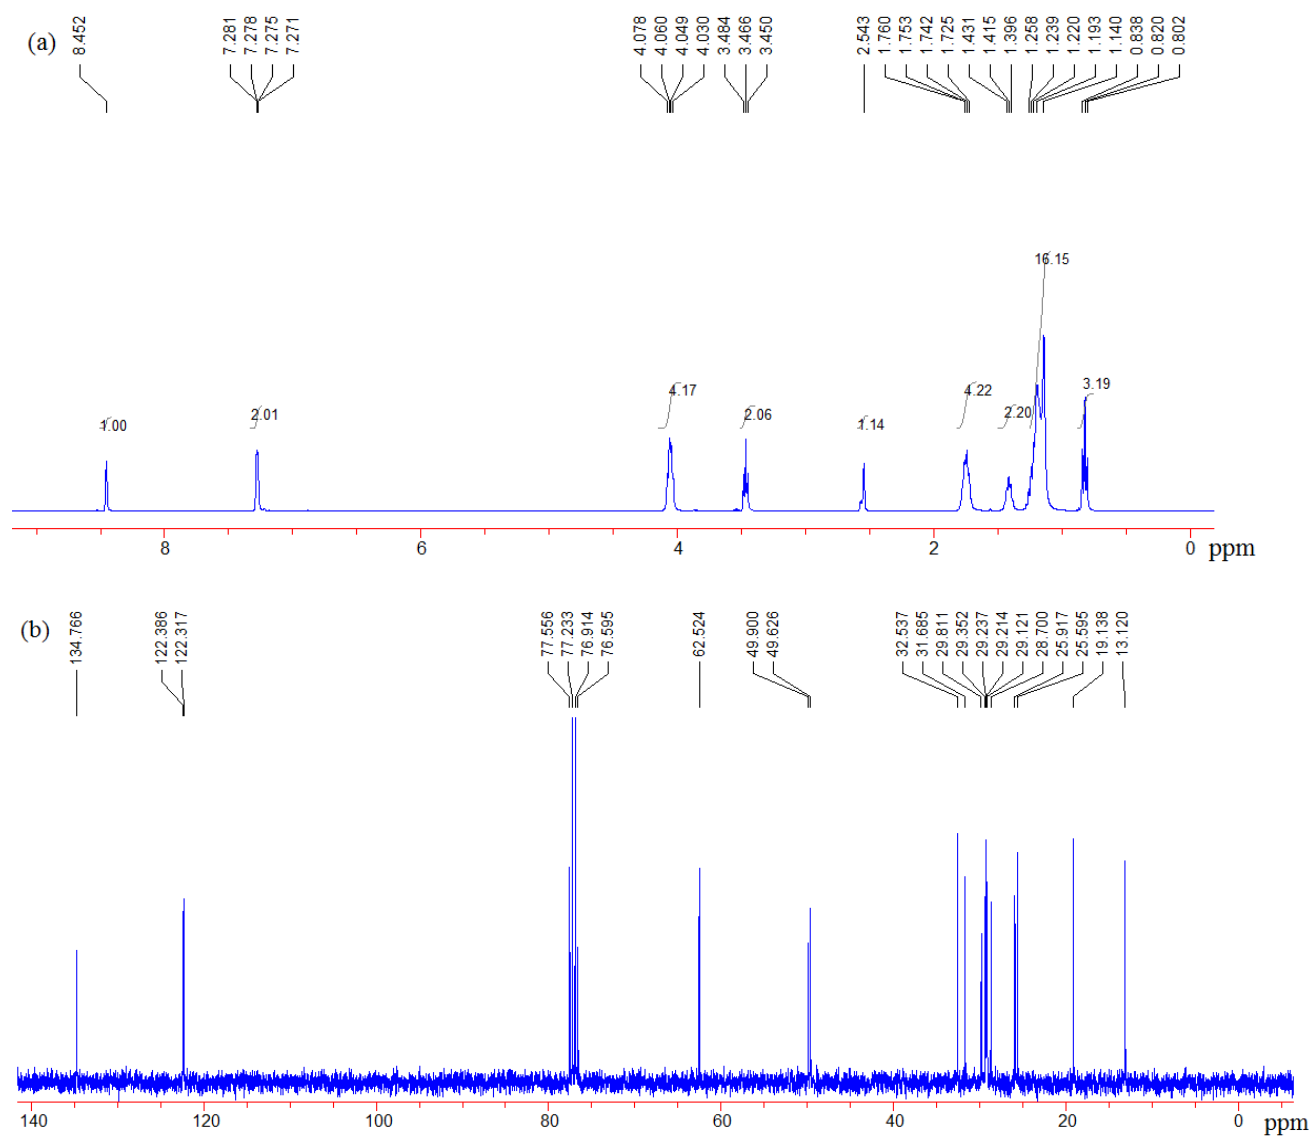

**Fig. S4** <sup>1</sup>H NMR (a) and <sup>13</sup>C NMR (b) spectra of [C<sub>4</sub>C<sub>11</sub>OHim]BF<sub>4</sub>; solvent: CDCl<sub>3</sub>.

<sup>1</sup>H NMR: 0.802-0.838 (3H, t), 1.140-1.258 (16H, m), 1.396-1.431 (2H, t), 1.725-1.760 (4H, m), 2.543 (1H, s), 3.450-3.484 (2H, t), 4.030-4.078 (4H, m), 7.271-7.281 (2H, m), 8.452 (1H, s);

<sup>13</sup>C NMR: 13.120, 19.138, 25.595, 25.917, 28.700, 29.121, 29.214, 29.237, 29.352, 29.811, 31.685, 32.537, 49.626, 49.900, 62.524, 122.317, 122.386, 134.766.

Elemental analysis (% , calc.): C 56.0 (56.6), H 9.3 (9.2), N 7.4 (7.3).

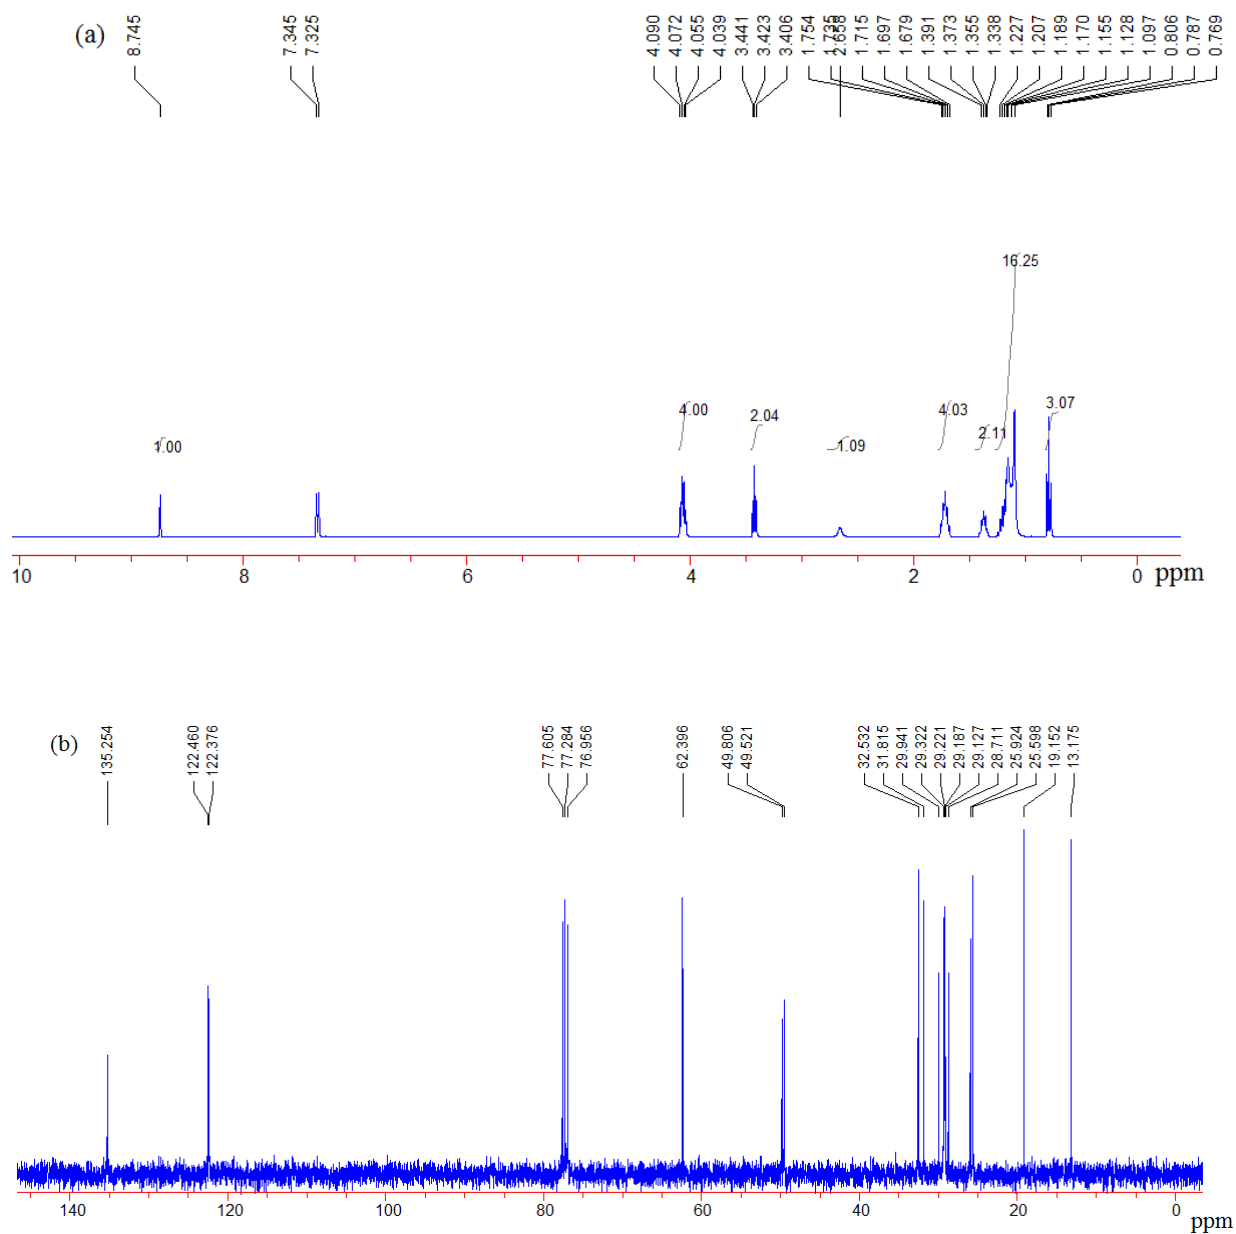

**Fig. S5**  $^1\text{H}$ NMR (a) and  $^{13}\text{C}$ NMR (b) spectra of  $[\text{C}_4\text{C}_{11}\text{OHim}]\text{PF}_6$ ; solvent:  $\text{CDCl}_3$ .

$^1\text{H}$ NMR: 0.769-0.806 (3H, t), 1.097-1.227 (16H, m), 1.338-1.391 (2H, m), 1.679-1.754 (4H, m), 2.658 (1H, s), 3.406-3.441 (2H, t), 4.039-4.090 (4H, m), 7.325-7.345 (2H, d), 8.745 (1H, s);

$^{13}\text{C}$ NMR: 13.175, 19.152, 25.598, 25.924, 28.711, 29.127, 29.187, 29.221, 29.322, 29.941, 31.815, 32.532, 49.521, 49.806, 62.396, 122.376, 122.460, 135.254.

Elemental analysis (% , calc.): C 49.2 (49.1), H 8.1 (8.0), N 6.5 (6.4).

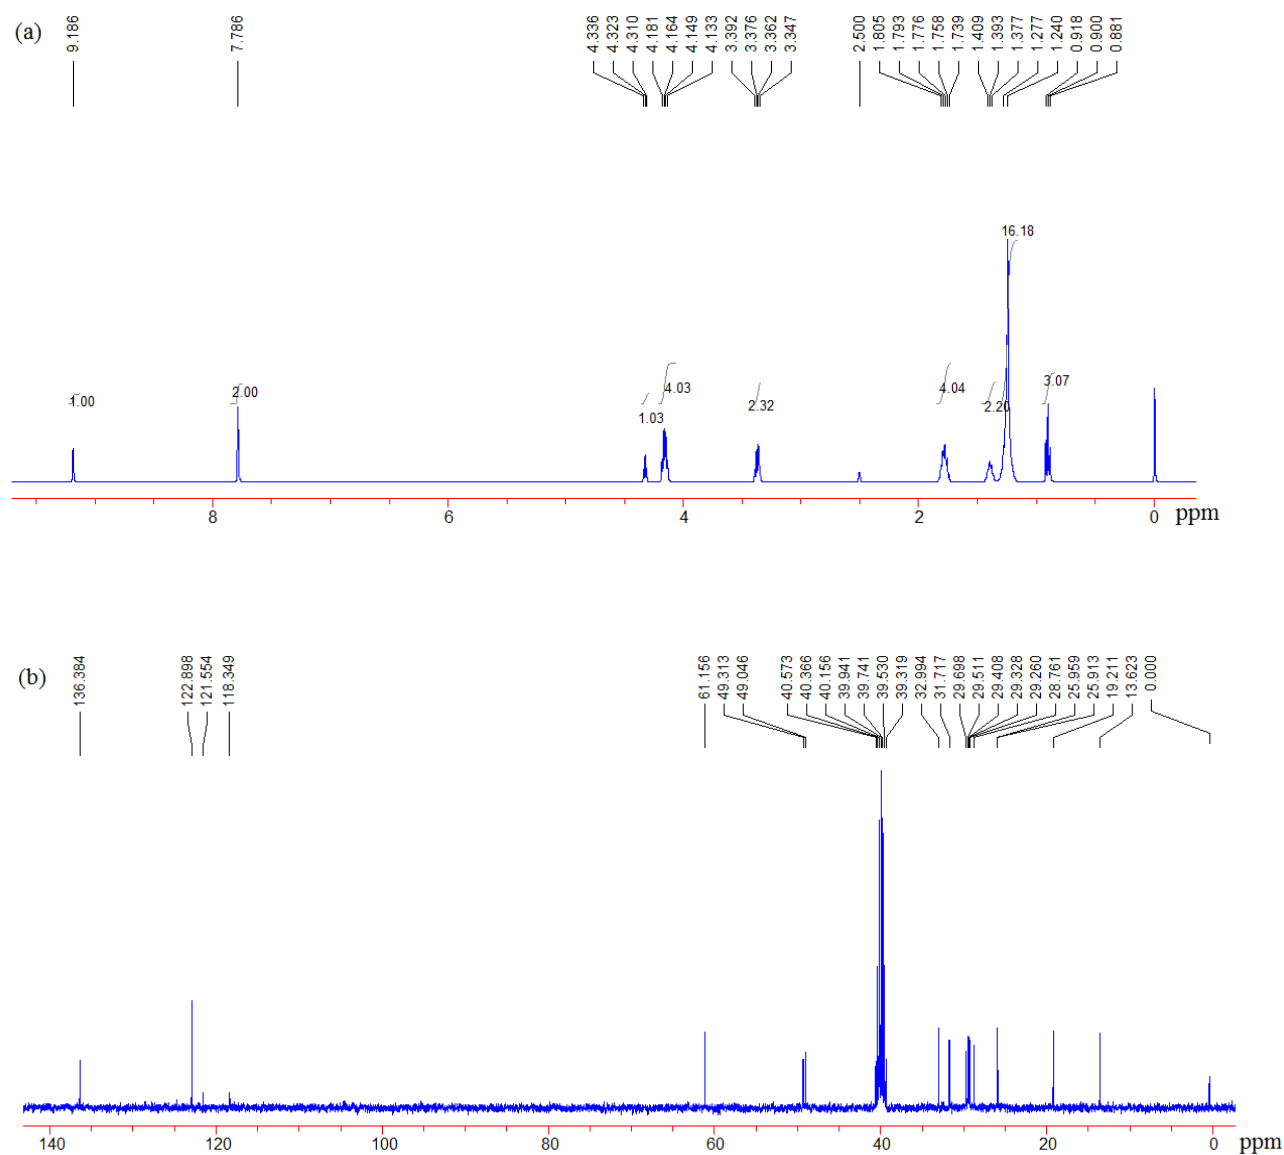

**Fig. S6** <sup>1</sup>H NMR (a) and <sup>13</sup>C NMR (b) spectra of [C<sub>4</sub>C<sub>11</sub>OHim]<sup>+</sup>NTf<sub>2</sub><sup>-</sup>; solvent: (CD<sub>3</sub>)<sub>2</sub>SO.

<sup>1</sup>H NMR: 0.881-0.918 (3H, t), 1.240-1.277 (16H, d), 1.377-1.409 (2H, t), 1.739-1.805 (4H, m), 2.500 (solvent residual signal), 3.347-3.392 (2H, m), 4.133-4.181 (4H, m), 4.310-4.336 (1H, t), 7.786 (2H, s), 9.186 (1H, s);

<sup>13</sup>C NMR: 13.623, 19.211, 25.913, 25.959, 28.761, 29.260, 29.328, 29.408, 29.511, 29.698, 31.717, 32.994, 49.046, 49.313, 61.156, 118.349, 121.554, 122.898, 136.384.

Elemental analysis (% , calc.): 42.1 (41.7), H 6.2 (6.1), N 7.2 (7.3), S 10.9 (11.1).

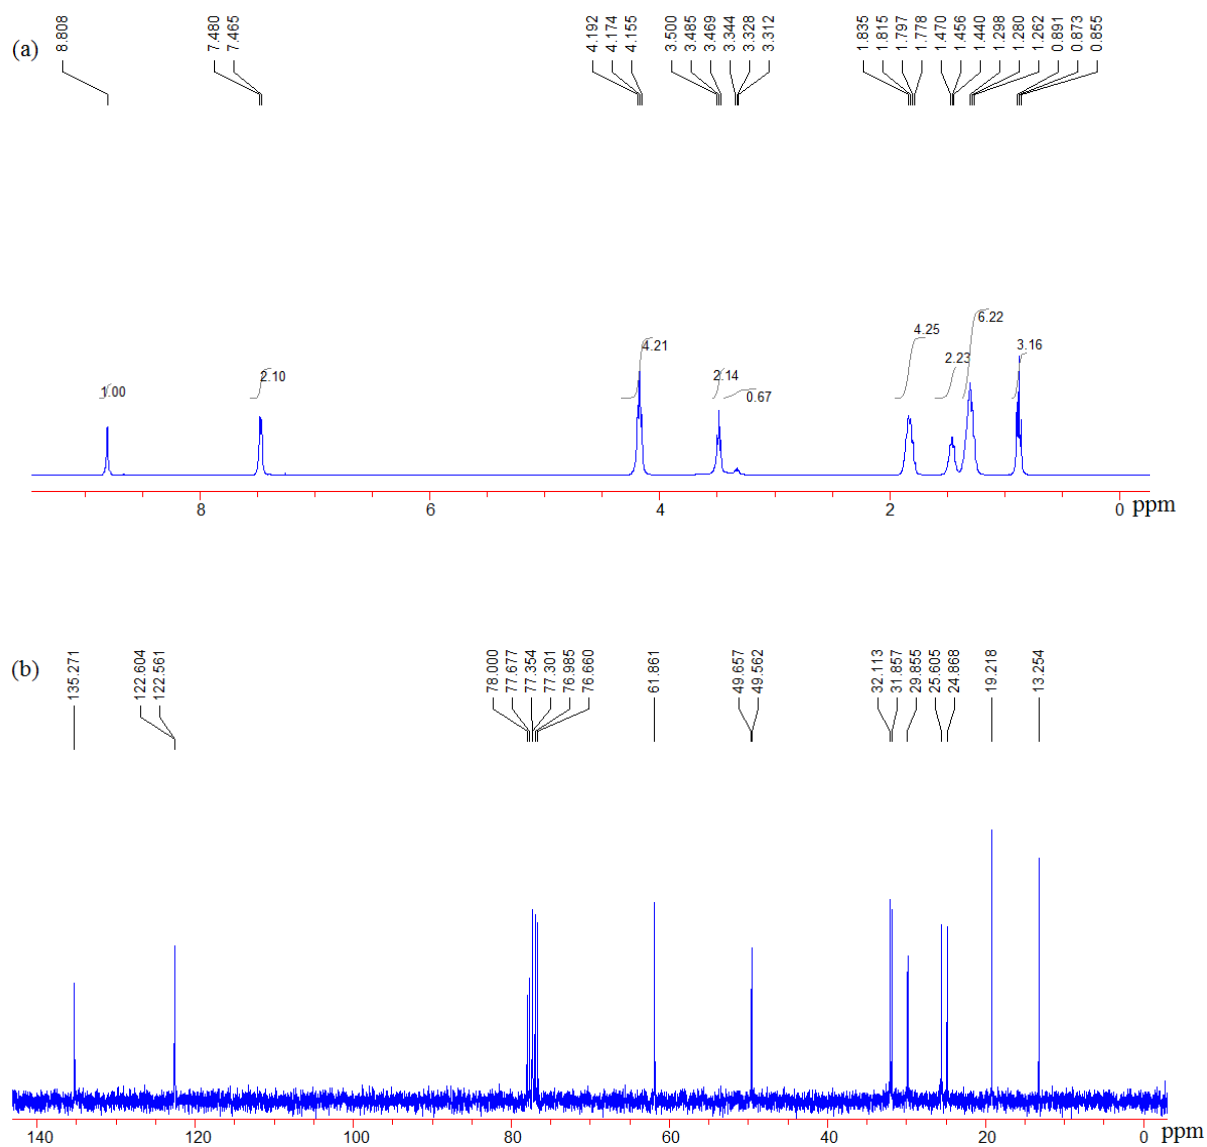

**Fig. S7**  $^1\text{H}$ NMR (a) and  $^{13}\text{C}$ NMR (b) spectra of  $[\text{C}_4\text{C}_6\text{OHim}]\text{BF}_4$ ; solvent:  $\text{CDCl}_3$ .

$^1\text{H}$ NMR: 0.855-0.891 (3H, t), 1.262-1.298 (6H, t), 1.440-1.470 (2H, t), 1.778-1.835 (4H, m), 3.312-3.344 (1H, t), 3.469-3.500 (2H, t), 4.155-4.192 (4H, t), 7.465-7.480 (2H, d), 8.808 (1H, s);

$^{13}\text{C}$ NMR: 13.254, 19.218, 24.868, 25.605, 29.855, 31.857, 32.113, 49.562, 49.657, 61.861, 122.561, 122.604, 135.271.

Elemental analysis (% , calc.): C 50.1 (50.0), H 8.2 (8.1), N 9.1 (9.0).

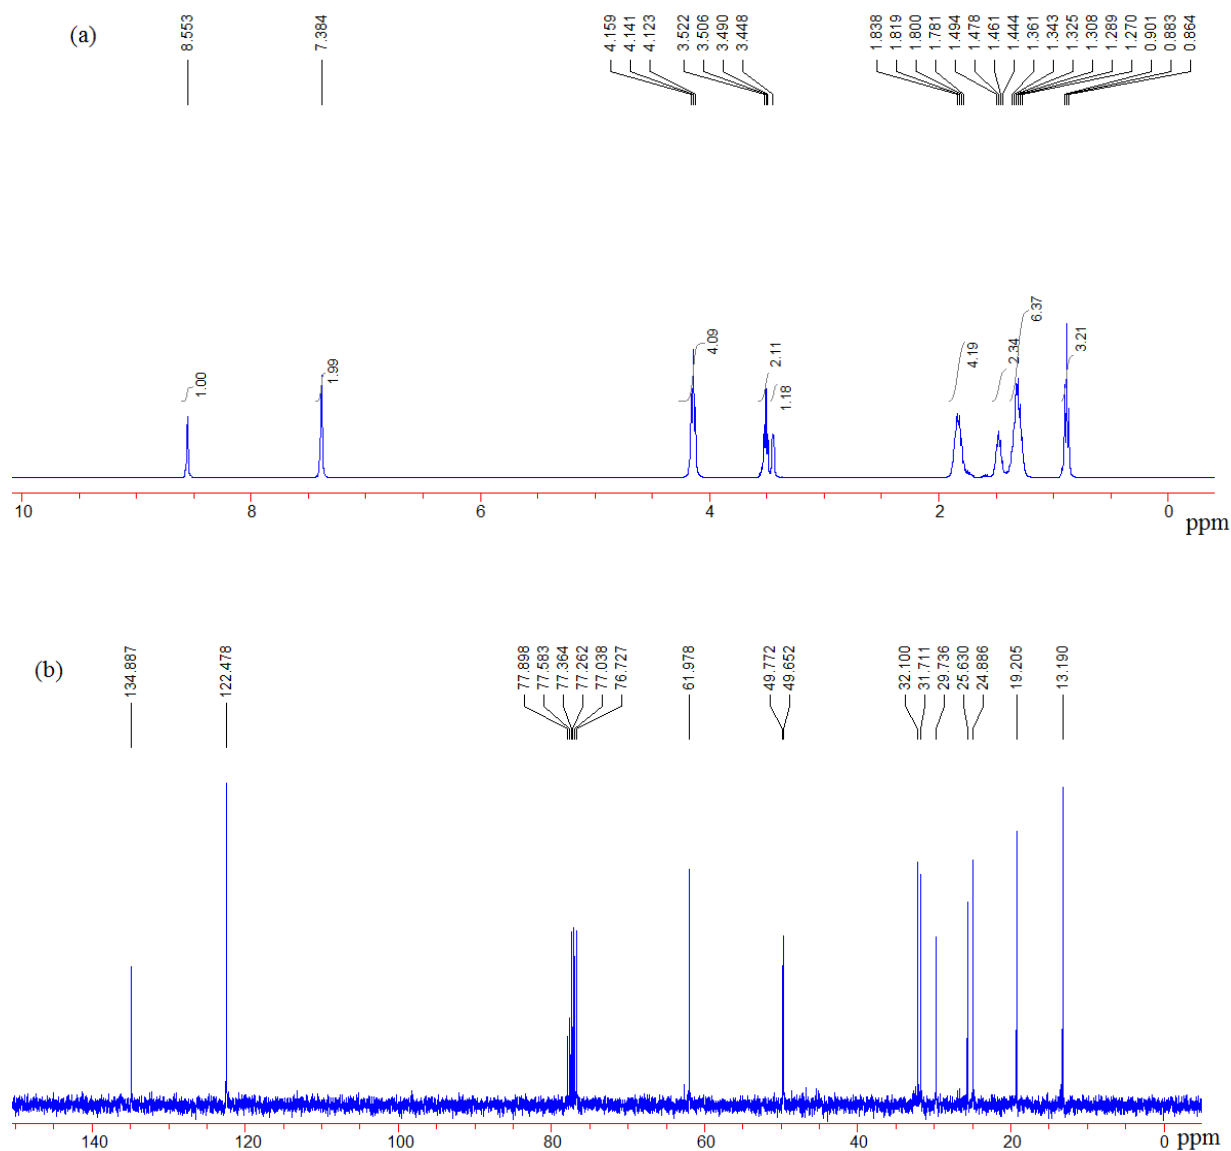

**Fig. S8** <sup>1</sup>H NMR (a) and <sup>13</sup>C NMR (b) spectra of [C<sub>4</sub>C<sub>6</sub>OHim]<sup>+</sup>PF<sub>6</sub><sup>-</sup>; solvent: CDCl<sub>3</sub>.

<sup>1</sup>H NMR: 0.864-0.901 (3H, t), 1.270-1.361 (6H, m), 1.444-1.494 (2H, m), 1.781-1.838 (4H, m), 3.448 (1H, s), 3.490-3.522 (2H, t), 4.123-4.159 (4H, t), 7.384 (2H, s), 8.553 (1H, s);

<sup>13</sup>C NMR: 13.190, 19.205, 24.886, 25.630, 29.736, 31.711, 32.100, 49.652, 49.772, 61.978, 122.478, 134.887.

Elemental analysis (% , calc.): C 42.6 (42.2), H 6.7 (6.8), N 7.6 (7.6).

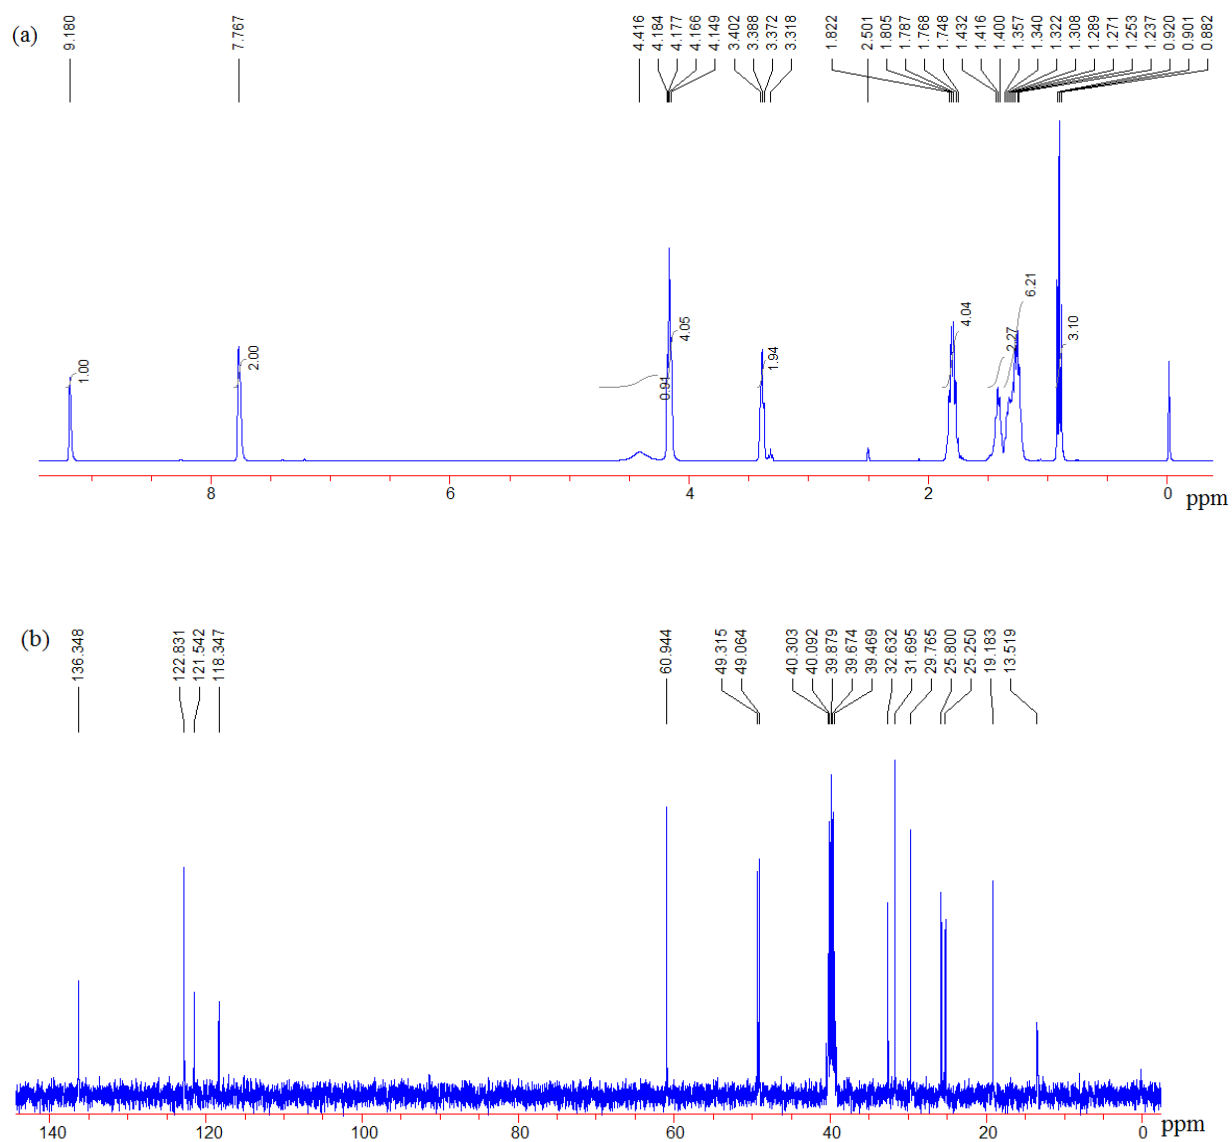

**Fig. S9**  $^1\text{H}$ NMR (a) and  $^{13}\text{C}$ NMR (b) spectra of  $[\text{C}_4\text{C}_6\text{OHim}]\text{NTf}_2$ ; solvent:  $(\text{CD}_3)_2\text{SO}$ .

$^1\text{H}$ NMR: 0.882-0.920 (3H, t), 1.237-1.357 (6H, m), 1.400-1.432 (2H, t), 1.748-1.822 (4H, m), 2.501 (solvent residual signal), 3.318 (signal of trace water in solvent), 3.372-3.402 (2H, t), 4.149-4.184 (4H, m), 4.416 (1H, s), 7.767 (2H, s), 9.180 (1H, s);

$^{13}\text{C}$ NMR: 13.519, 19.183, 25.250, 25.800, 29.765, 31.695, 32.632, 49.064, 49.315, 60.944, 118.347, 121.542, 122.831, 136.348.

Elemental analysis (% , calc.): C 35.8 (35.7), H 4.9 (5.0), N 8.4 (8.3), S 12.4 (12.7).

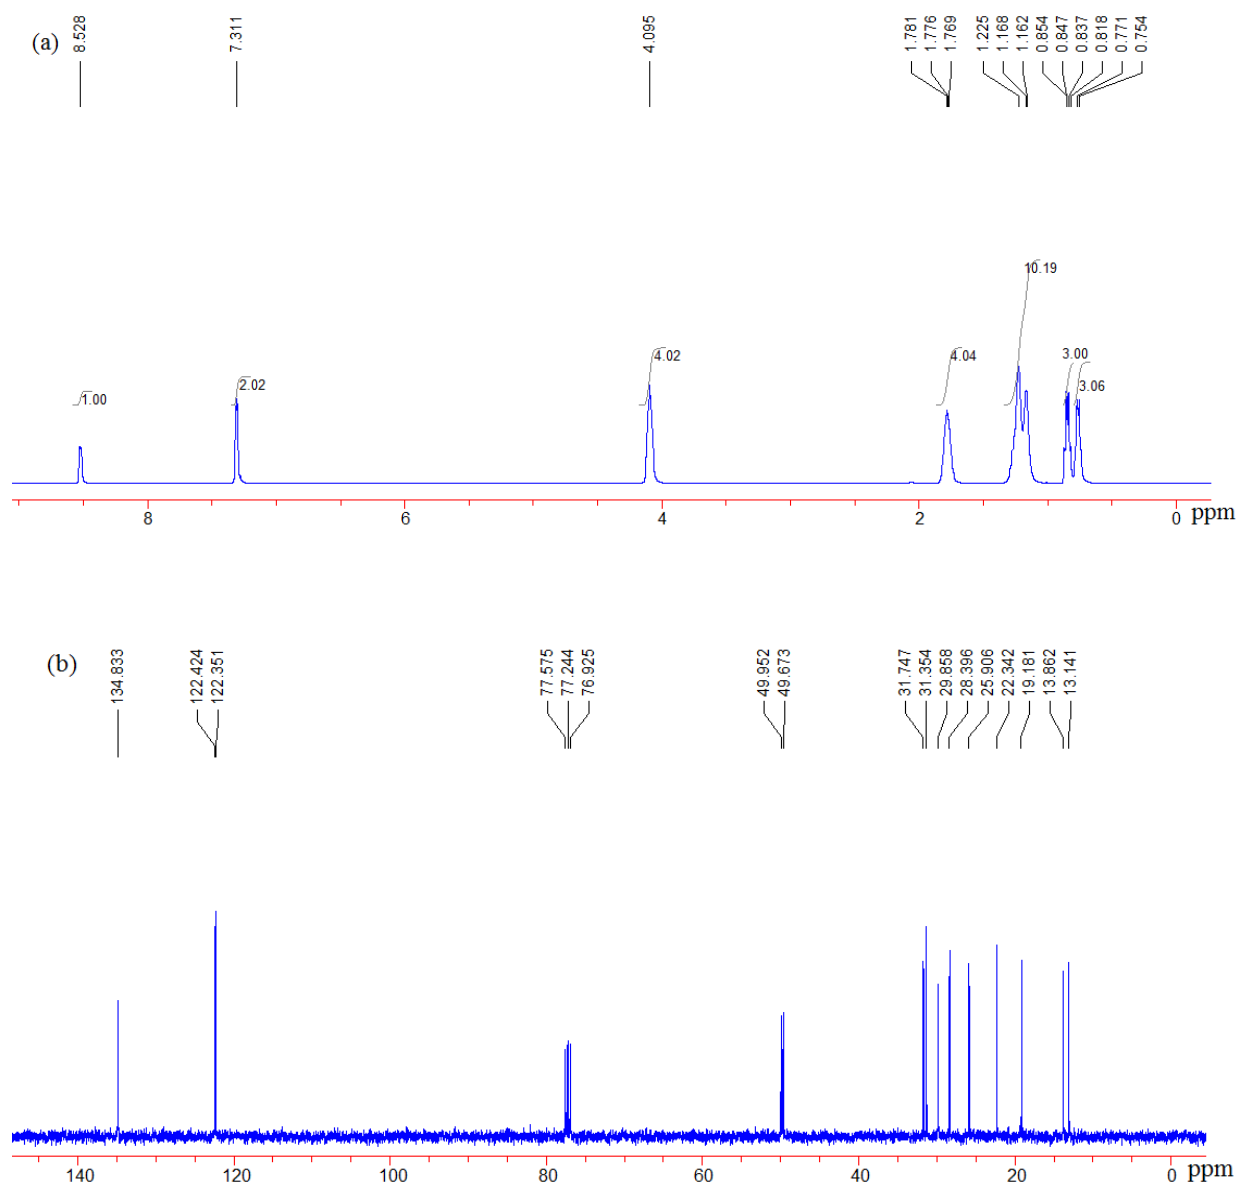

**Fig. S10** <sup>1</sup>H NMR (a) and <sup>13</sup>C NMR (b) spectra of [C<sub>4</sub>C<sub>7</sub>im]PF<sub>6</sub>; solvent: CDCl<sub>3</sub>.

<sup>1</sup>H NMR: 0.754-0.771 (3H, d), 0.818-0.854 (3H, m), 1.162-1.225 (10H, t), 1.769-1.781 (4H, t), 4.095 (4H, s), 7.311 (2H, s), 8.528 (1H, s);

<sup>13</sup>C NMR: 13.141, 13.862, 19.181, 22.342, 25.906, 28.396, 29.858, 31.354, 31.747, 49.673, 49.952, 122.351, 122.424, 134.833.

Elemental analysis (% , calc.): C 45.5 (45.7), H 7.4 (7.4), N 7.8 (7.6).

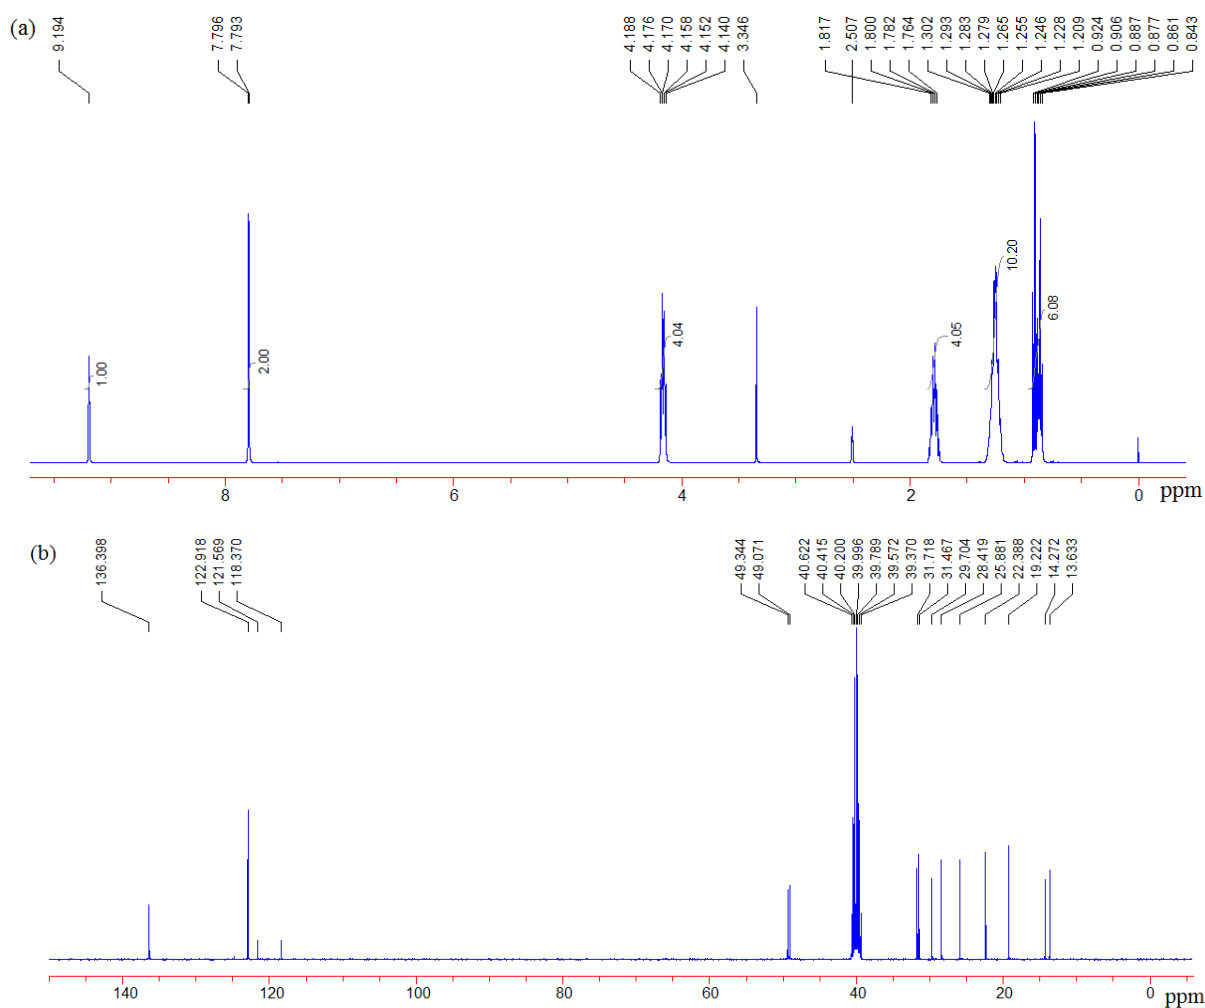

**Fig. S11**  $^1\text{H}$ NMR (a) and  $^{13}\text{C}$ NMR (b) spectra of  $[\text{C}_4\text{C}_7\text{im}]\text{NTf}_2$ ; solvent:  $(\text{CD}_3)_2\text{SO}$ .

$^1\text{H}$ NMR: 0.843-0.924 (6H, m), 1.209-1.302 (10H, m), 1.764-1.817 (4H, m), 2.507 (solvent residual signal), 3.346 (signal of trace water in solvent), 4.140-4.188 (4H, m), 7.793-7.796 (2H, d), 9.194 (1H, s);

$^{13}\text{C}$ NMR: 13.633, 14.272, 19.222, 22.388, 25.881, 28.419, 29.704, 31.467, 31.718, 49.071, 49.344, 118.370, 121.569, 122.918, 136.398.

Elemental analysis: C 38.4 (38.2), H 5.5 (5.4), N 8.5 (8.3), S 12.5 (12.7).



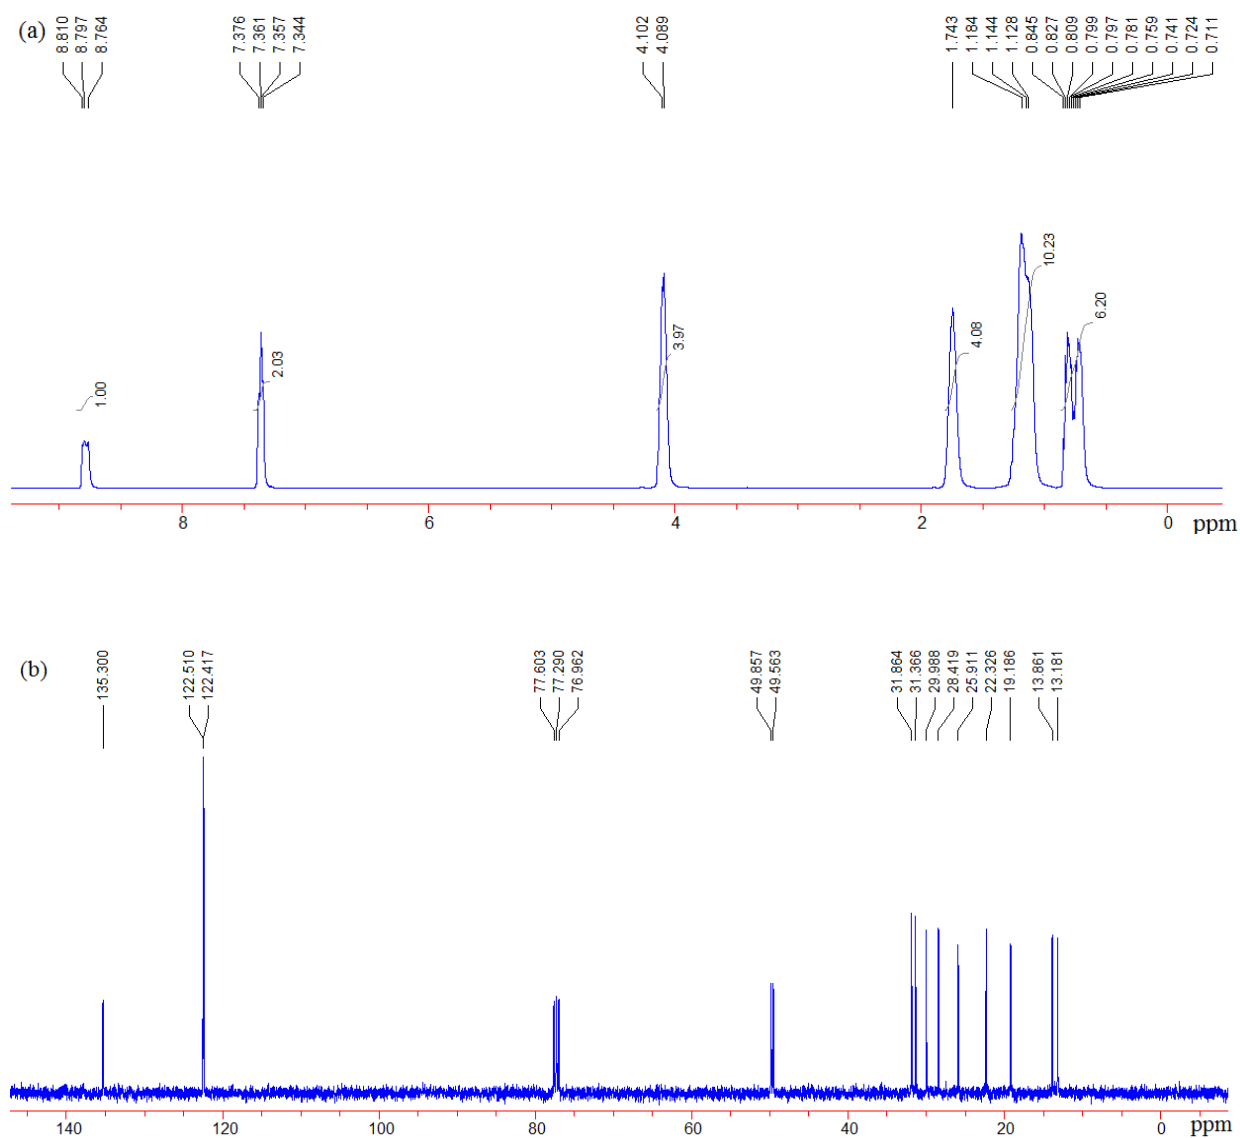

**Fig. S12**  $^1\text{H}$ NMR (a) and  $^{13}\text{C}$ NMR (b) spectra of  $[\text{C}_4\text{C}_7\text{im}]\text{BF}_4$ ; solvent:  $\text{CDCl}_3$ .

$^1\text{H}$ NMR: 0.711-0.845 (6H, m), 1.128-1.184 (10H, t), 1.743 (4H, s), 4.089-4.102 (4H, d), 7.344-7.376 (2H, m), 8.764-8.810 (1H, m);

$^{13}\text{C}$ NMR: 13.181, 13.861, 19.186, 22.326, 25.911, 28.419, 29.988, 31.366, 31.864, 49.563, 49.857, 122.417, 122.510, 135.300.

Elemental analysis (% , calc.): C 54.1 (54.2), H 8.6 (8.8), N 9.1 (9.0).

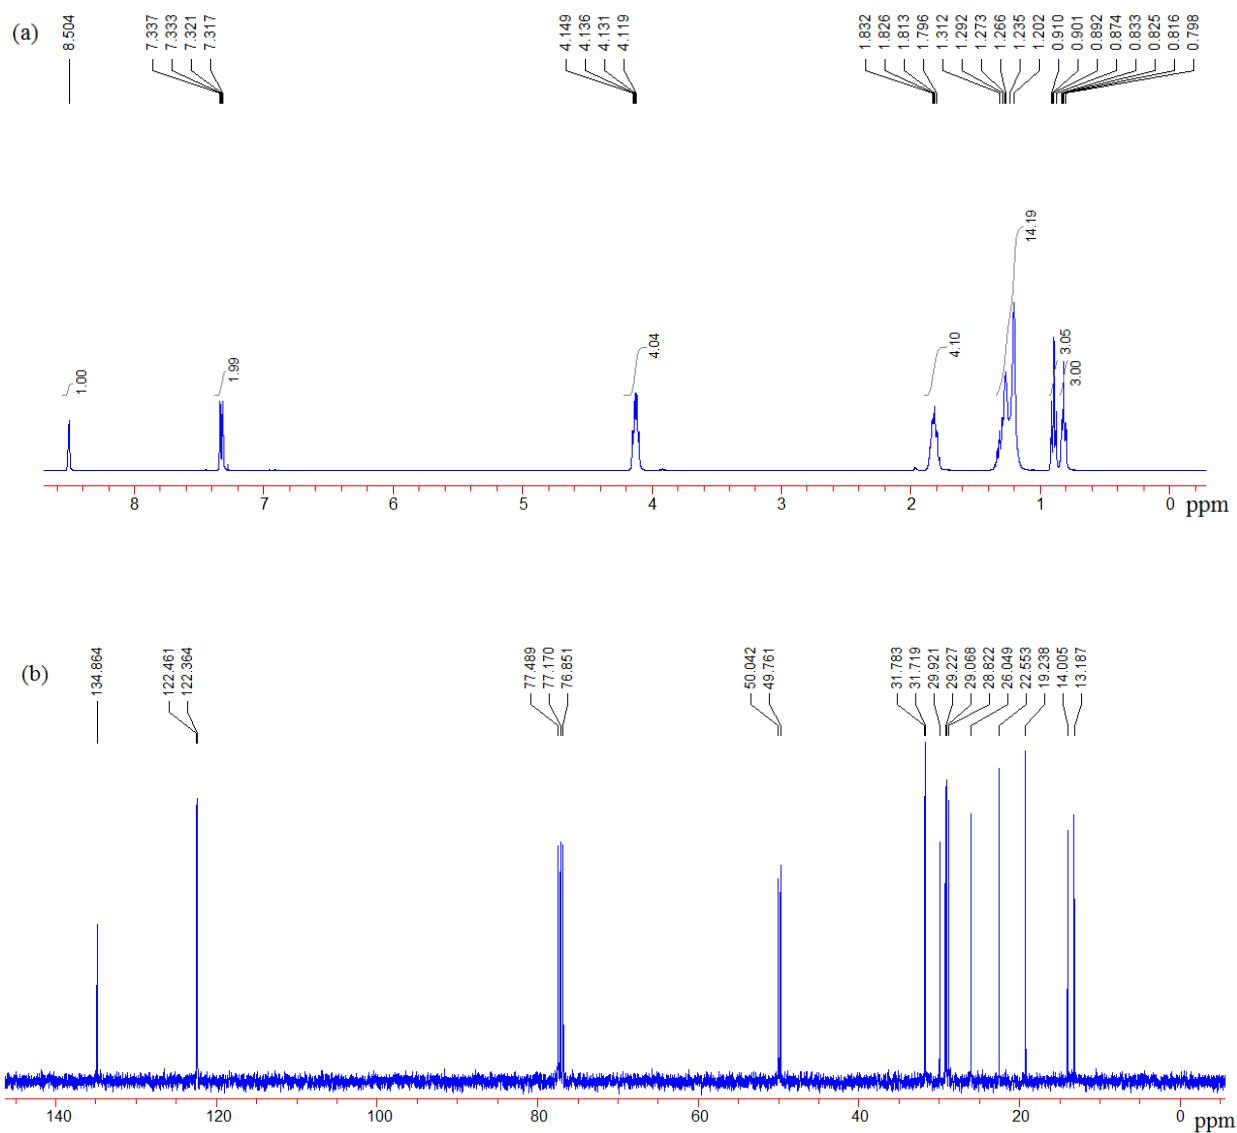

**Fig. S13**  $^1\text{H}$ NMR (a) and  $^{13}\text{C}$ NMR (b) spectra of  $[\text{C}_4\text{C}_9\text{im}]\text{PF}_6$ ; solvent:  $\text{CDCl}_3$ .

$^1\text{H}$ NMR: 0.798-0.833 (3H, m), 0.874-0.910 (3H, m), 1.202-1.312 (14H, m), 1.796-1.832 (4H, m), 4.119-4.149 (4H, m), 7.317-7.337 (2H, m), 8.504 (1H, s);

$^{13}\text{C}$ NMR: 13.187, 14.005, 19.238, 22.553, 26.049, 28.822, 29.068, 29.227, 29.921, 31.719, 31.783, 49.761, 50.042, 122.364, 122.461, 134.864.

Elemental analysis (% , calc.): C 49.0 (48.5), H 7.9 (7.9), N 7.2 (7.1).

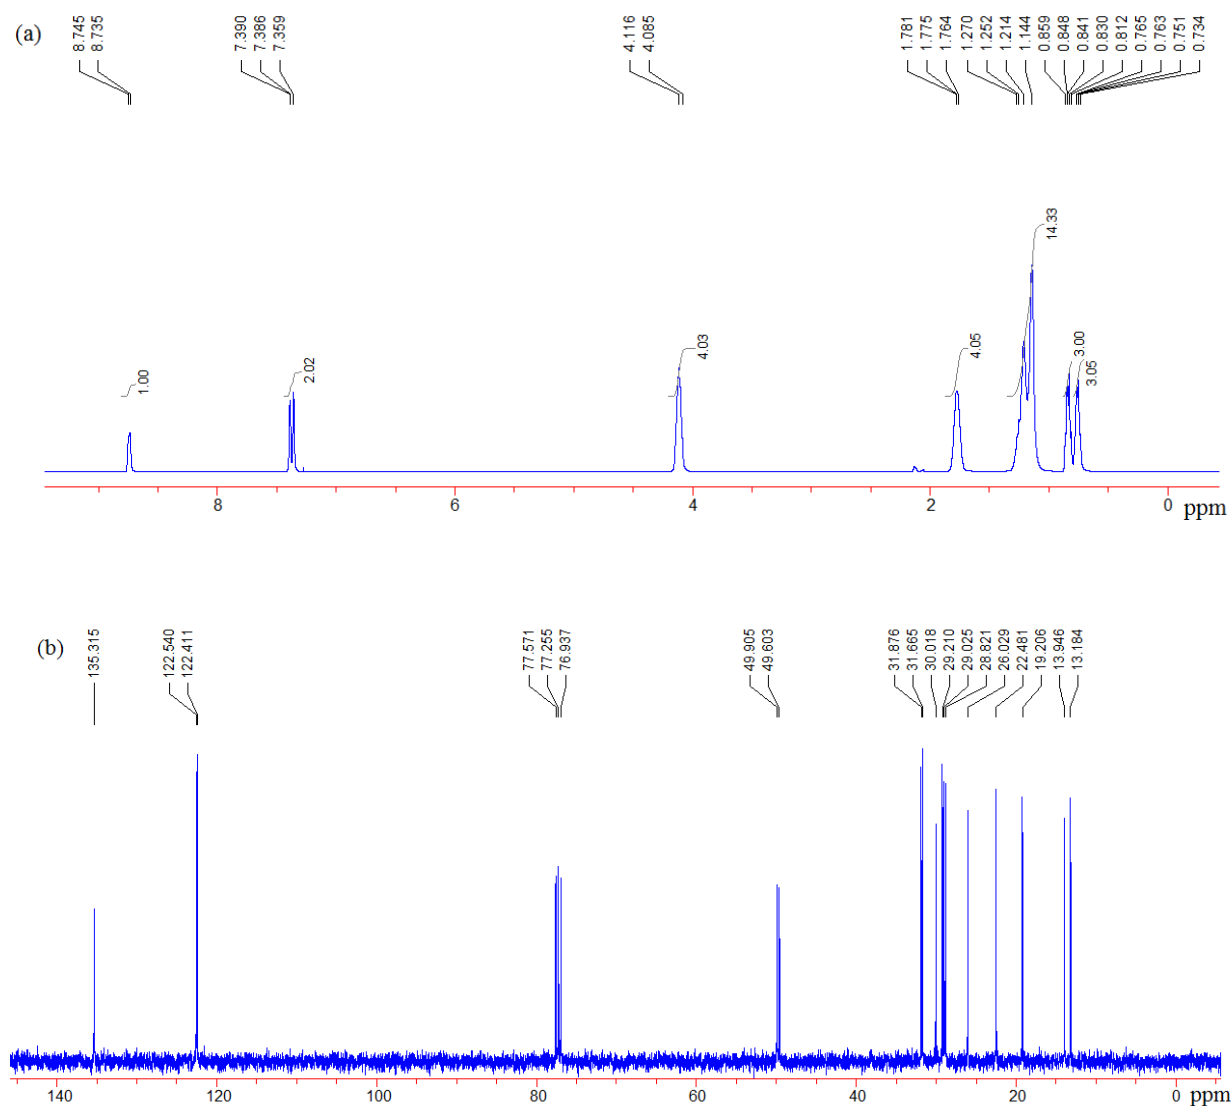

**Fig. S14** <sup>1</sup>H NMR (a) and <sup>13</sup>C NMR (b) spectra of [C<sub>4</sub>C<sub>9</sub>im]BF<sub>4</sub>; solvent: CDCl<sub>3</sub>.

<sup>1</sup>H NMR: 0.734-0.765 (3H, m), 0.812-0.859 (3H, m), 1.144-1.270 (14H, m), 1.764-1.781 (4H, t), 4.085-4.116 (4H, d), 7.359-7.390 (2H, t), 8.735-8.745 (1H, d);

<sup>13</sup>C NMR: 13.184, 13.946, 19.206, 22.481, 26.029, 28.821, 29.025, 29.210, 30.018, 31.665, 31.876, 49.603, 49.905, 122.411, 122.540, 135.315.

Elemental analysis (% , calc.): C 56.8 (56.8), H 9.3 (9.2), N 8.4 (8.3).

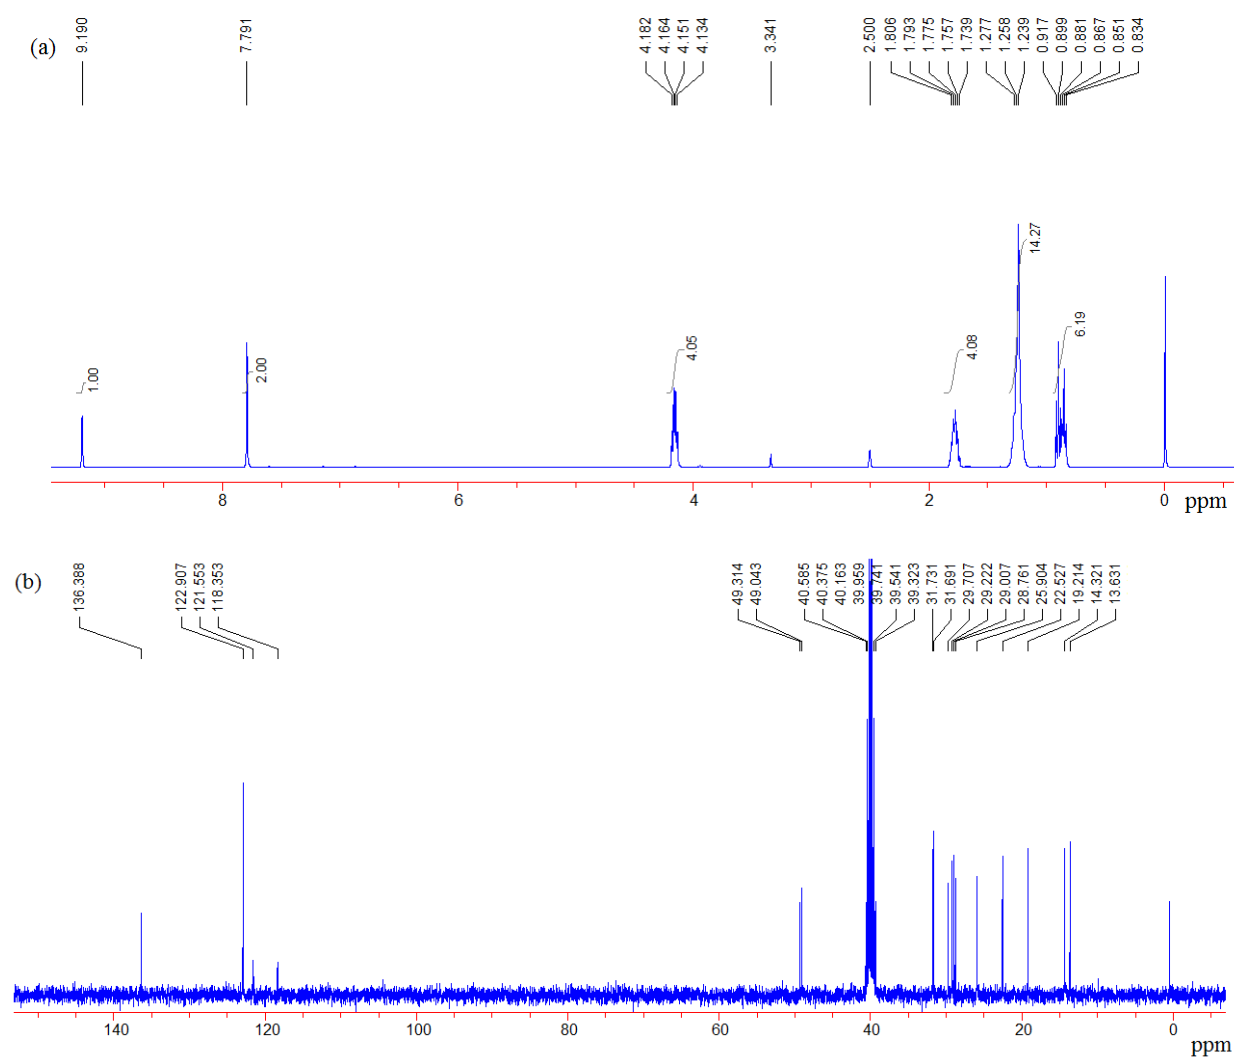

**Fig. S15**  $^1\text{H}$ NMR (a) and  $^{13}\text{C}$ NMR (b) spectra of  $[\text{C}_4\text{C}_9\text{im}]\text{NTf}_2$ ; solvent:  $(\text{CD}_3)_2\text{SO}$ .

$^1\text{H}$ NMR: 0.834-0.917 (6H, m), 1.239-1.277 (14H, t), 1.739-1.806 (4H, m), 2.500 (solvent residual signal), 3.341 (singal of trace water in solvent), 4.134-4.182 (4H, m), 7.791 (2H, d), 9.190 (1H, s);

$^{13}\text{C}$ NMR: 13.631, 14.321, 19.214, 22.527, 25.904, 28.761, 29.007, 29.222, 29.707, 31.691, 31.731, 49.043, 49.314, 118.353, 121.553, 122.907, 136.388.

Elemental analysis (% , calc.): C 40.6 (40.7), H 5.9 (5.9), N 7.8 (7.9), S 11.8 (12.1).

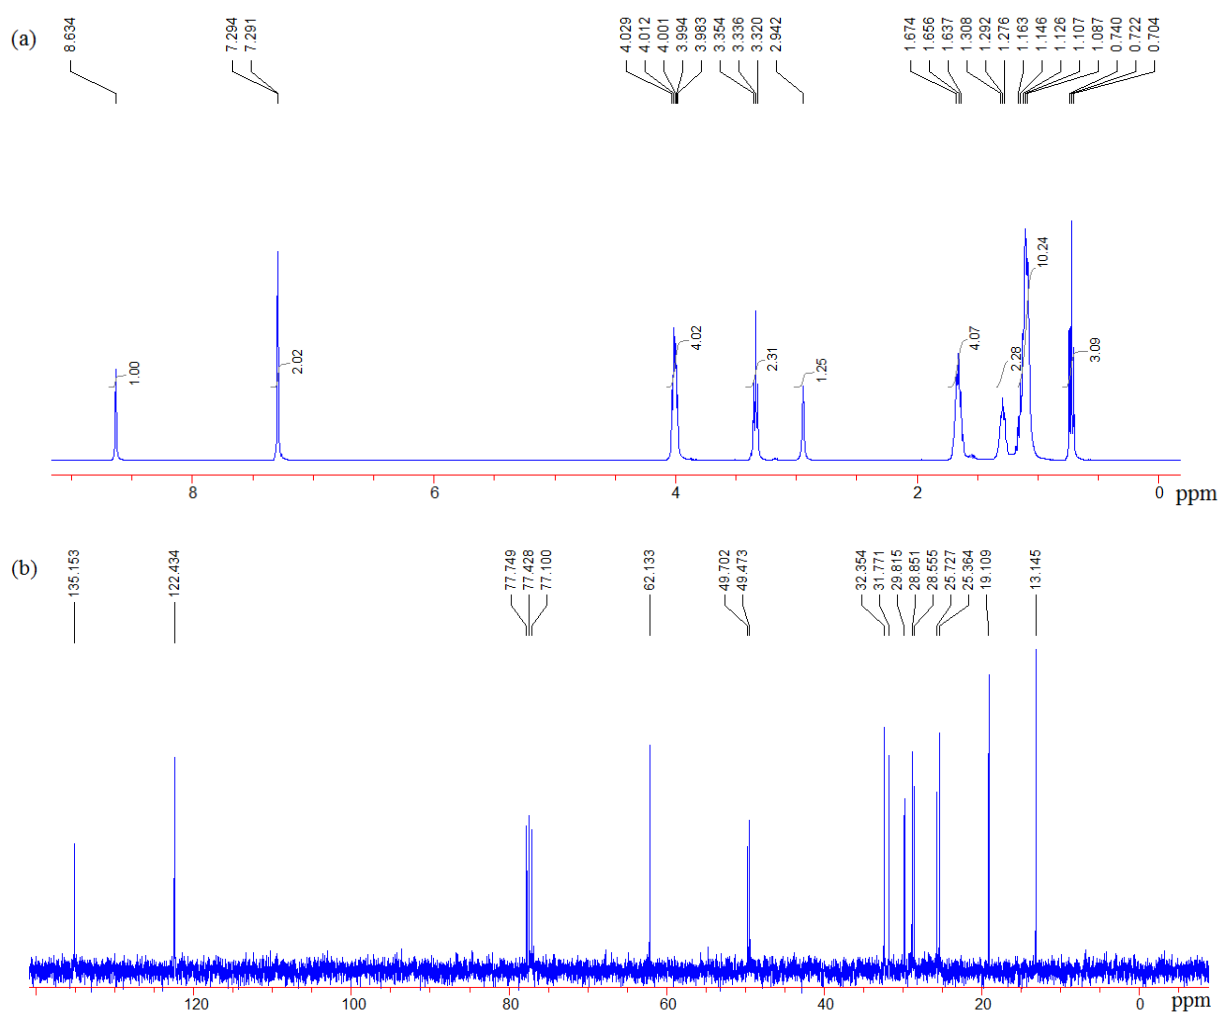

**Fig. S16** <sup>1</sup>H NMR (a) and <sup>13</sup>C NMR (b) spectra of [C<sub>4</sub>C<sub>8</sub>OHim]<sup>+</sup>BF<sub>4</sub><sup>-</sup>; solvent: CDCl<sub>3</sub>.

<sup>1</sup>H NMR: 0.704-0.740 (3H, t), 1.087-1.146 (10H, m), 1.276-1.308 (2H, t), 1.637-1.674 (4H, t), 2.942 (1H, s), 3.320-3.354 (2H, t), 3.983-4.029 (4H, m), 7.292-7.294 (2H, d), 8.634 (1H, s);

<sup>13</sup>C NMR: 13.145, 19.109, 25.364, 25.727, 28.555, 28.851, 29.815, 31.771, 32.354, 49.473, 49.702, 62.133, 122.434, 135.153.

Elemental analysis (% , calc.): C 53.1 (53.0), H 8.7 (8.6), N 8.1 (8.2).

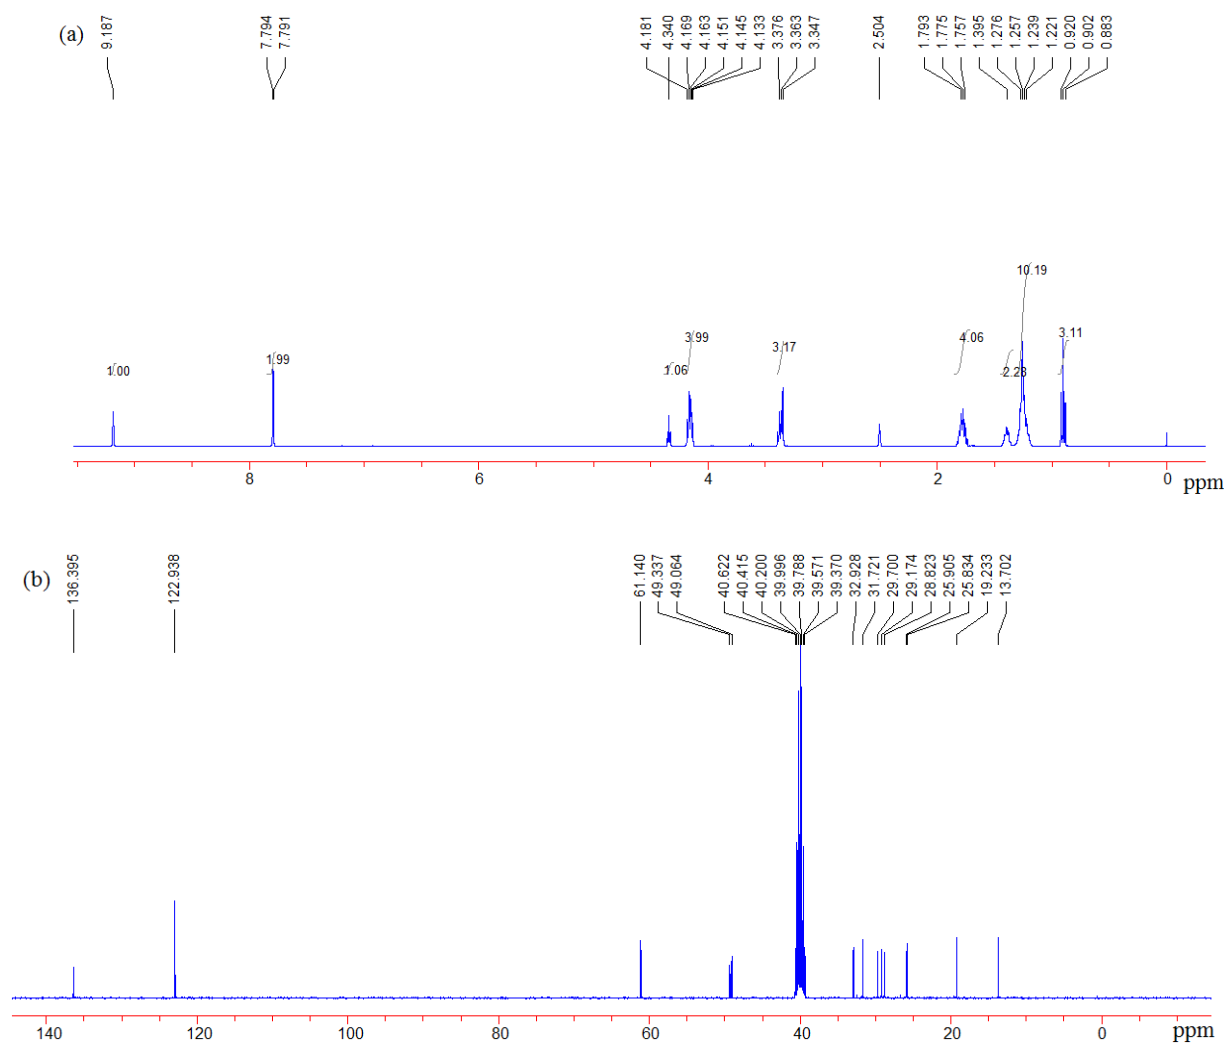

**Fig. S17** <sup>1</sup>H NMR (a) and <sup>13</sup>C NMR (b) spectra of [C<sub>4</sub>C<sub>8</sub>OHim]PF<sub>6</sub>; solvent: (CD<sub>3</sub>)<sub>2</sub>SO.

<sup>1</sup>H NMR: 0.883-0.920 (3H, t), 1.221-1.276 (10H, m), 1.395 (2H, s), 1.757-1.793 (4H, t), 2.504 (solvent residual signal), 3.347-3.376 (2H, t, containing the signal of trace water in solvent), 4.133-4.181 (4H, m), 4.340 (1H, s), 7.791-7.794 (2H, d), 9.187 (1H, s);

<sup>13</sup>C NMR: 13.702, 19.233, 25.834, 25.905, 28.823, 29.174, 29.700, 31.721, 32.928, 49.064, 49.337, 61.140, 122.938, 136.395.

Elemental analysis (% , calc.): C 45.4 (45.2), H 7.4 (7.3), N 6.9 (7.0).

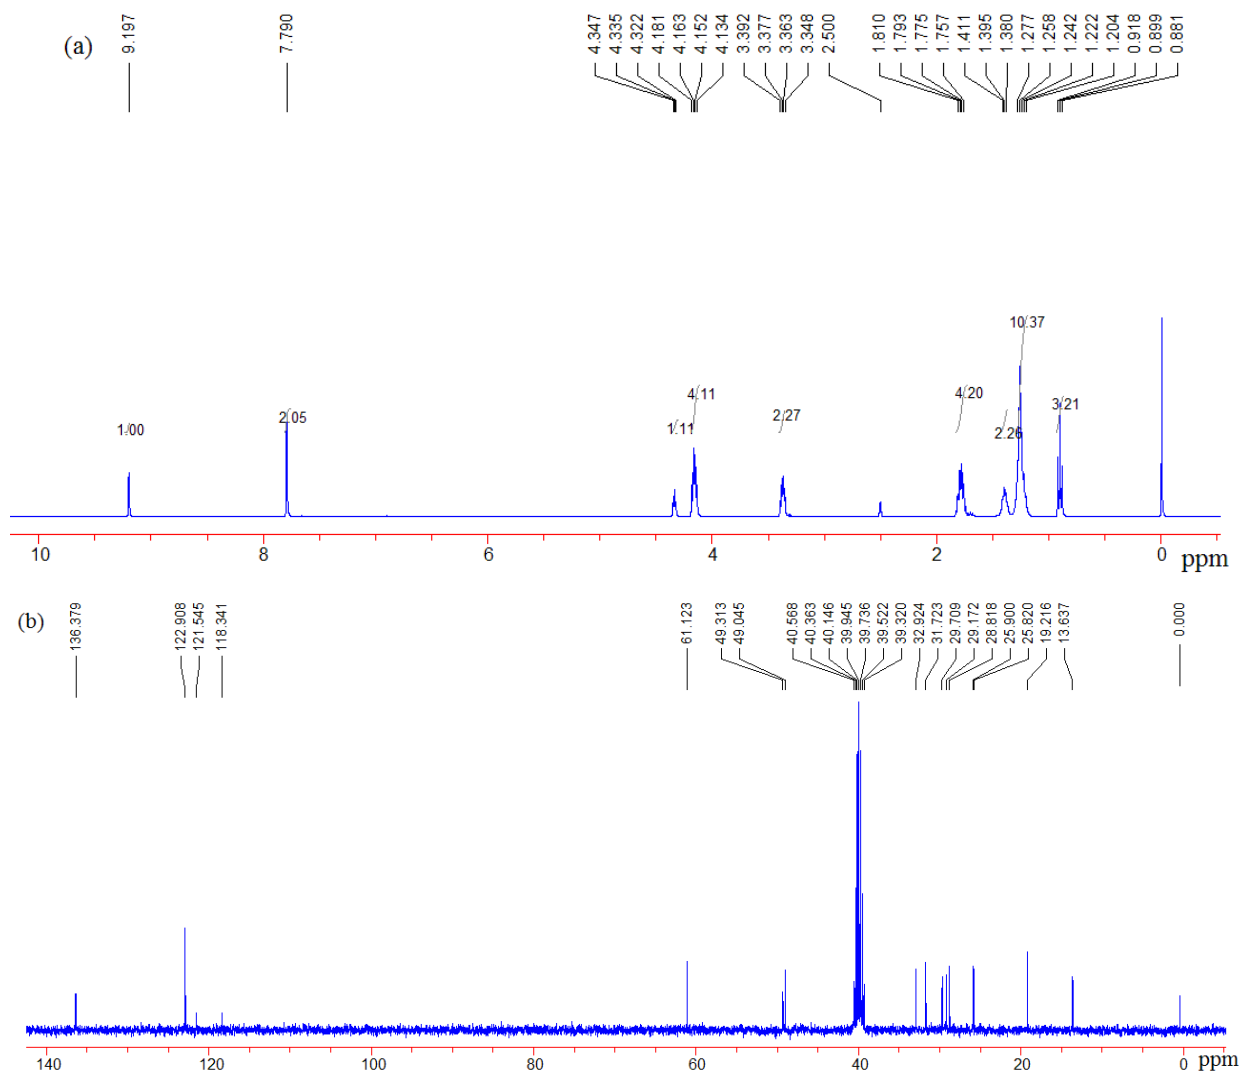

**Fig. S18**  $^1\text{H}$ NMR (a) and  $^{13}\text{C}$ NMR (b) spectra of  $[\text{C}_4\text{C}_8\text{OHim}]\text{NTf}_2$ ; solvent:  $(\text{CD}_3)_2\text{SO}$ .

$^1\text{H}$ NMR: 0.881-0.918 (3H, t), 1.204-1.277 (10H, m), 1.380-1.411 (2H, t), 1.757-1.810 (4H, m), 2.500 (solvent residual signal), 3.348-3.392 (2H, m), 4.134-4.181 (4H, m), 4.322-4.347 (1H, t), 7.790 (2H, s), 9.197 (1H, s);

$^{13}\text{C}$ NMR: 13.637, 19.216, 25.820, 25.900, 28.818, 29.172, 29.709, 31.723, 32.924, 49.045, 49.313, 61.123, 118.341, 121.545, 122.908, 136.379.

Elemental analysis (% , calc.): C 38.7 (38.3), H 5.4 (5.5), N 7.7 (7.9), S 11.8 (12.0).

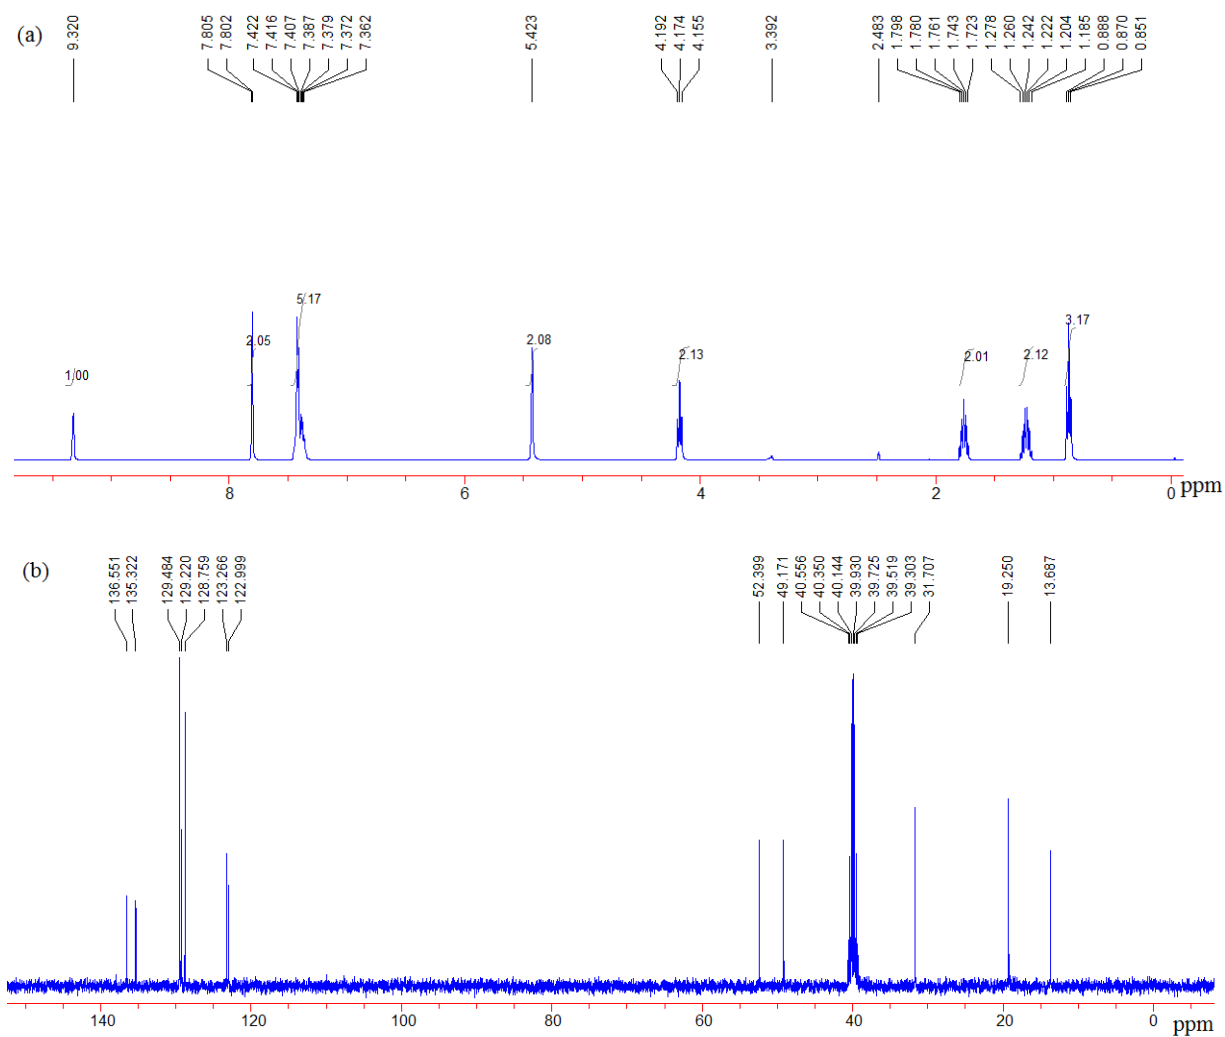

**Fig. S19**  $^1\text{H}$ NMR (a) and  $^{13}\text{C}$ NMR (b) spectra of  $[\text{C}_4\text{Beim}]\text{BF}_4$ ; solvent:  $(\text{CD}_3)_2\text{SO}$ .

$^1\text{H}$ NMR: 0.851-0.888 (3H, t), 1.185-1.278 (2H, m), 1.723-1.798 (2H, m), 2.483 (solvent residual signal), 3.392 (signal of trace water in solvent), 4.155-4.192 (2H, t), 5.423 (2H, s), 7.362-7.422 (5H, m), 7.802-7.805 (2H, d), 9.320 (1H, s);

$^{13}\text{C}$ NMR: 13.687, 19.250, 31.707, 49.171, 52.399, 122.999, 123.266, 128.759, 129.220, 129.484, 135.322, 136.551.

Elemental analysis (% , calc.): C 55.6 (55.7), H 6.4 (6.3), N 9.2 (9.3).



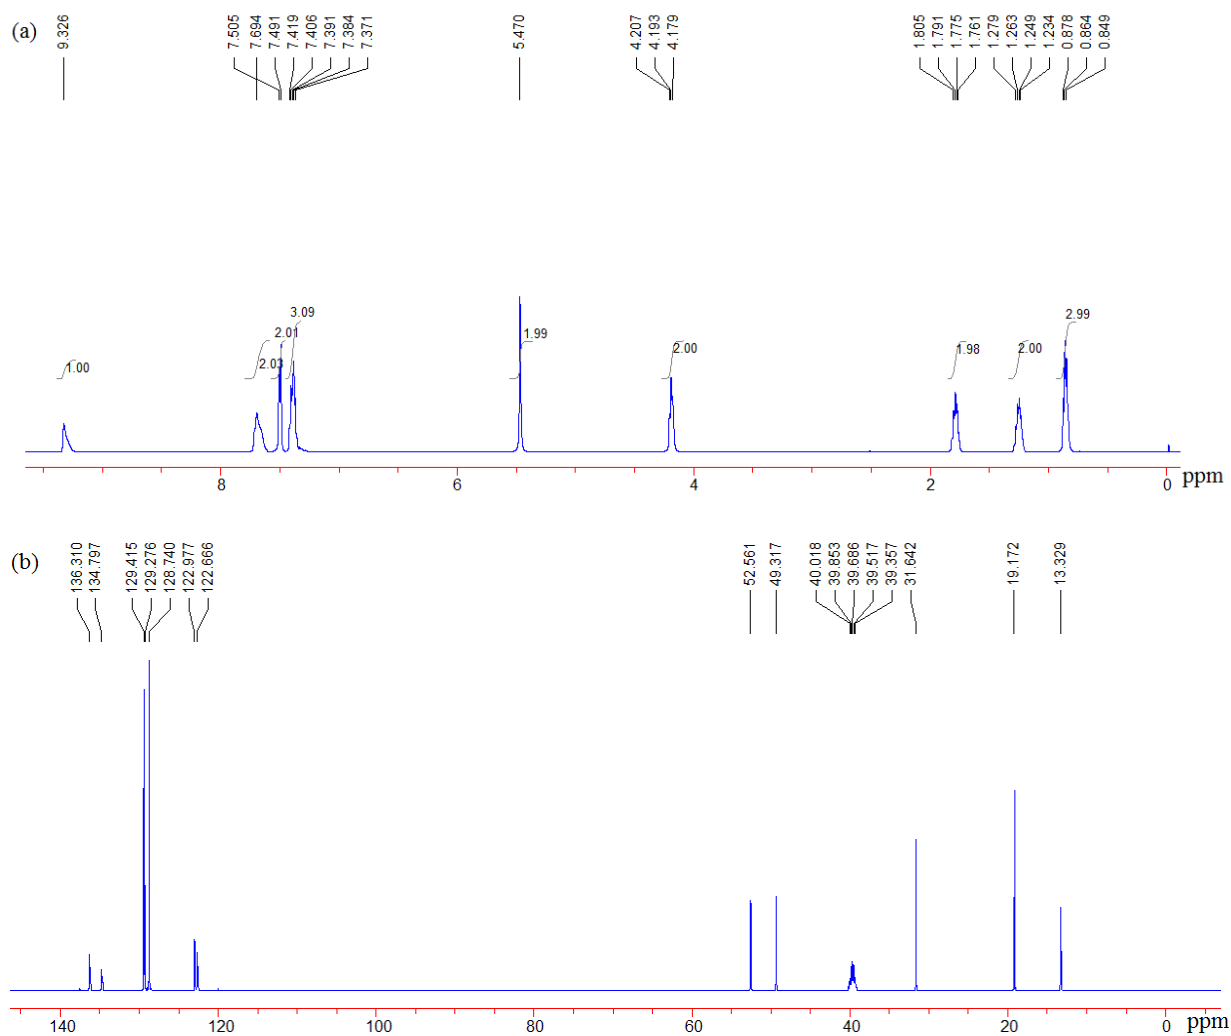

**Fig. S20**  $^1\text{H}$ NMR (a) and  $^{13}\text{C}$ NMR (b) spectra of  $[\text{C}_4\text{Beim}]\text{PF}_6$ ; solvent:  $(\text{CD}_3)_2\text{SO}$ .

$^1\text{H}$ NMR: 0.849-0.878 (3H, t), 1.234-1.279 (2H, m), 1.761-1.805 (2H, m), 4.179-4.207 (2H, t), 5.470 (2H, s), 7.371-7.419 (3H, m), 7.491-7.505 (2H, d), 7.694 (1H, s), 9.326 (1H, s);

$^{13}\text{C}$ NMR: 13.329, 19.172, 31.642, 49.317, 52.561, 122.666, 122.977, 128.740, 129.276, 129.415, 134.797, 136.310.

Elemental analysis (% , calc.): C 47.0 (46.7), H 5.4 (5.3), N 7.9 (7.8).

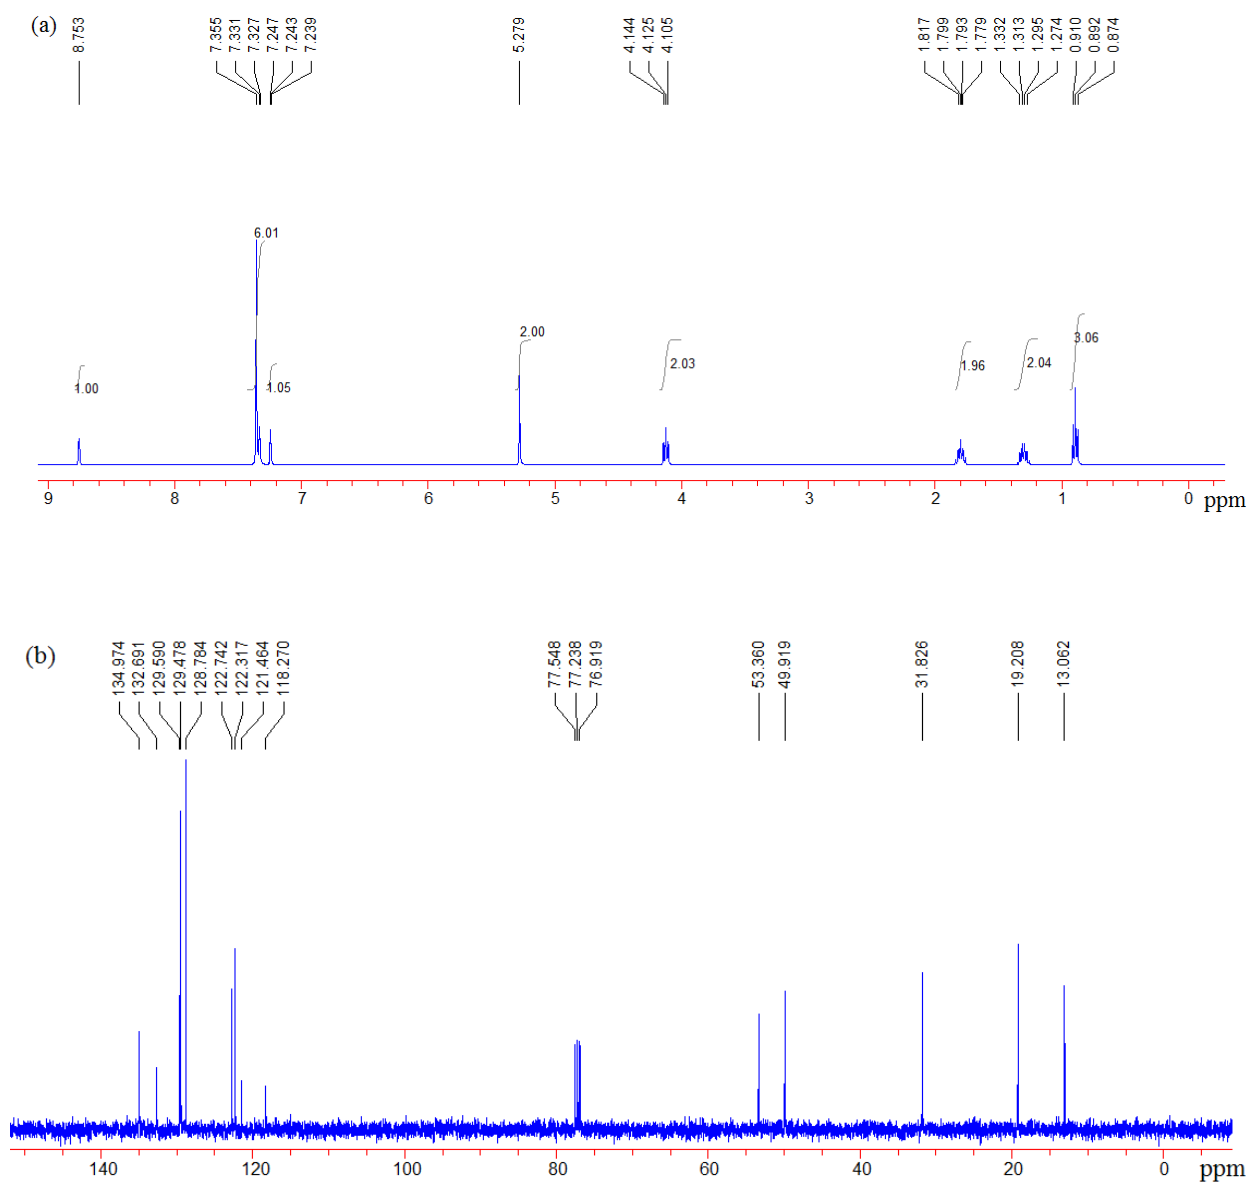

**Fig. S21** <sup>1</sup>H NMR (a) and <sup>13</sup>C NMR (b) spectra of [C<sub>4</sub>Beim]NTf<sub>2</sub>; solvent: CDCl<sub>3</sub>.

<sup>1</sup>H NMR: 0.874-0.910 (3H, t), 1.274-1.332 (2H, m), 1.779-1.817 (2H, m), 4.105-4.144 (2H, t), 5.279 (2H, s), 7.239-7.247 (1H, t), 7.327-7.355 (6H, t), 8.753 (1H, s);

<sup>13</sup>C NMR: 13.062, 19.208, 31.826, 49.919, 53.360, 118.270, 121.464, 122.317, 122.742, 128.784, 129.478, 129.590, 132.691, 134.974.

Elemental analysis (% , calc.): C. 39.0 (38.8), H 3.9 (3.9), N 8.6 (8.5), S 12.7 (12.9).

**Table S1. Extraction Efficiencies (*E*, %) of the ILs (average value, *n* = 3).**

| pH                                                  | 2.0  | 3.0  | 5.0  | 6.0  | 7.0  | 9.0  | 10   | 12   |
|-----------------------------------------------------|------|------|------|------|------|------|------|------|
| [C <sub>8</sub> mim]PF <sub>6</sub>                 |      |      |      |      |      |      |      |      |
| resorcinol                                          | 13.4 | 13.2 | 13.0 | 13.5 | 13.0 | 13.0 | 12.9 | 8.26 |
| phenol                                              | 65.0 | 64.9 | 66.4 | 64.7 | 66.6 | 65.2 | 65.1 | 18.9 |
| guaiacol                                            | 74.1 | 76.0 | 75.0 | 75.2 | 75.9 | 75.4 | 74.4 | 42.2 |
| <i>p</i> -nitrophenol                               | 80.0 | 82.7 | 82.3 | 80.0 | 78.9 | 25.6 | 17.0 | 10.7 |
| <i>o</i> -cresol                                    | 82.9 | 85.5 | 83.4 | 84.8 | 83.8 | 83.3 | 84.5 | 46.9 |
| [C <sub>8</sub> mim]BF <sub>4</sub>                 |      |      |      |      |      |      |      |      |
| resorcinol                                          | 68.8 | 69.0 | 69.4 | 68.8 | 69.5 | 70.9 | 70.7 | 33.7 |
| phenol                                              | 84.0 | 86.1 | 84.7 | 86.0 | 84.7 | 84.8 | 86.0 | 41.2 |
| guaiacol                                            | 87.4 | 88.1 | 88.5 | 87.1 | 85.5 | 88.8 | 87.7 | 44.9 |
| <i>p</i> -nitrophenol                               | 94.2 | 95.5 | 94.3 | 95.6 | 92.8 | 85.2 | 84.3 | 84.5 |
| <i>o</i> -cresol                                    | 93.1 | 94.9 | 93.1 | 94.4 | 92.7 | 95.0 | 95.1 | 79.5 |
| [C <sub>4</sub> C <sub>7</sub> im]PF <sub>6</sub>   |      |      |      |      |      |      |      |      |
| resorcinol                                          | 13.1 | 13.1 | 13.2 | 12.9 | 12.9 | 13.4 | 13.5 | 7.86 |
| phenol                                              | 65.3 | 67.2 | 65.8 | 65.0 | 67.1 | 65.1 | 66.4 | 20.7 |
| guaiacol                                            | 76.2 | 76.7 | 75.5 | 75.9 | 78.0 | 78.6 | 77.2 | 41.1 |
| <i>p</i> -nitrophenol                               | 81.4 | 82.0 | 81.1 | 80.9 | 79.3 | 53.9 | 38.1 | 32.6 |
| <i>o</i> -cresol                                    | 84.4 | 85.8 | 85.1 | 84.2 | 86.1 | 86.7 | 85.9 | 48.7 |
| [C <sub>4</sub> C <sub>7</sub> im]BF <sub>4</sub>   |      |      |      |      |      |      |      |      |
| resorcinol                                          | 71.2 | 72.9 | 71.6 | 72.3 | 69.9 | 72.2 | 73.1 | 32.1 |
| phenol                                              | 86.7 | 89.4 | 87.1 | 87.4 | 87.9 | 89.3 | 88.6 | 45.4 |
| guaiacol                                            | 85.3 | 86.8 | 86.6 | 86.4 | 87.3 | 88.8 | 87.9 | 46.2 |
| <i>p</i> -nitrophenol                               | 95.6 | 94.9 | 96.2 | 96.5 | 95.7 | 88.4 | 86.8 | 86.2 |
| <i>o</i> -cresol                                    | 94.0 | 95.9 | 94.7 | 94.9 | 95.8 | 96.0 | 95.6 | 82.1 |
| [C <sub>4</sub> C <sub>6</sub> OHim]PF <sub>6</sub> |      |      |      |      |      |      |      |      |
| resorcinol                                          | 57.8 | 57.0 | 56.2 | 57.7 | 58.9 | 58.5 | 57.5 | 26.9 |
| phenol                                              | 81.7 | 80.4 | 79.5 | 80.0 | 79.3 | 81.2 | 81.8 | 39.2 |
| guaiacol                                            | 84.3 | 86.2 | 85.1 | 84.5 | 84.8 | 84.8 | 83.8 | 43.5 |
| <i>p</i> -nitrophenol                               | 89.9 | 90.3 | 89.9 | 89.8 | 88.7 | 59.8 | 51.4 | 39.7 |
| <i>o</i> -cresol                                    | 89.3 | 92.0 | 89.8 | 88.9 | 88.7 | 92.2 | 92.6 | 64.2 |
| [C <sub>4</sub> C <sub>9</sub> im]PF <sub>6</sub>   |      |      |      |      |      |      |      |      |
| resorcinol                                          | 12.7 | 12.8 | 12.8 | 13.1 | 13.0 | 13.3 | 13.2 | 5.90 |
| phenol                                              | 63.5 | 63.3 | 63.7 | 63.8 | 63.2 | 63.6 | 64.0 | 20.5 |
| guaiacol                                            | 74.0 | 73.9 | 75.9 | 74.4 | 74.8 | 75.6 | 75.2 | 37.8 |
| <i>p</i> -nitrophenol                               | 81.0 | 80.1 | 80.5 | 81.9 | 81.9 | 48.0 | 39.0 | 28.2 |
| <i>o</i> -cresol                                    | 84.1 | 83.1 | 84.1 | 84.0 | 84.8 | 85.8 | 86.4 | 47.9 |
| [C <sub>4</sub> C <sub>9</sub> im]BF <sub>4</sub>   |      |      |      |      |      |      |      |      |
| resorcinol                                          | 71.6 | 71.4 | 71.5 | 71.8 | 71.9 | 72.0 | 71.1 | 31.8 |
| phenol                                              | 87.6 | 87.4 | 87.9 | 87.9 | 87.8 | 89.0 | 88.2 | 45.4 |
| guaiacol                                            | 86.8 | 86.4 | 86.7 | 86.7 | 86.5 | 87.7 | 86.9 | 50.9 |
| <i>p</i> -nitrophenol                               | 96.8 | 96.7 | 96.7 | 96.7 | 96.4 | 86.8 | 87.7 | 86.8 |
| <i>o</i> -cresol                                    | 95.4 | 93.2 | 95.7 | 95.0 | 95.5 | 96.0 | 95.9 | 84.7 |

Table S1. Continued.

| pH                                                   | 2.0  | 3.0  | 5.0  | 6.0  | 7.0  | 9.0  | 10   | 12   |
|------------------------------------------------------|------|------|------|------|------|------|------|------|
| [C <sub>4</sub> C <sub>8</sub> OHim]PF <sub>6</sub>  |      |      |      |      |      |      |      |      |
| resorcinol                                           | 57.2 | 57.8 | 58.8 | 56.6 | 57.9 | 56.7 | 56.1 | 28.3 |
| phenol                                               | 79.5 | 80.5 | 79.8 | 80.4 | 81.0 | 83.3 | 82.7 | 41.2 |
| guaiacol                                             | 83.9 | 83.9 | 84.0 | 84.3 | 85.3 | 86.8 | 85.8 | 40.3 |
| <i>p</i> -nitrophenol                                | 93.4 | 93.3 | 93.2 | 93.1 | 91.8 | 57.6 | 55.0 | 43.6 |
| <i>o</i> -cresol                                     | 90.5 | 90.6 | 90.6 | 91.0 | 91.6 | 92.1 | 93.4 | 62.9 |
| [C <sub>4</sub> C <sub>8</sub> OHim]BF <sub>4</sub>  |      |      |      |      |      |      |      |      |
| resorcinol                                           | 59.3 | 59.2 | 59.6 | 61.3 | 61.8 | 61.5 | 61.8 | 28.5 |
| phenol                                               | 70.1 | 69.1 | 69.6 | 71.2 | 71.5 | 71.2 | 71.7 | 35.7 |
| guaiacol                                             | 68.8 | 68.9 | 68.8 | 70.2 | 71.3 | 70.7 | 70.6 | 37.1 |
| <i>p</i> -nitrophenol                                | 89.3 | 89.4 | 88.8 | 87.9 | 87.8 | 56.4 | 57.8 | 56.2 |
| <i>o</i> -cresol                                     | 85.6 | 84.5 | 84.1 | 84.4 | 85.6 | 83.2 | 84.7 | 53.8 |
| [C <sub>4</sub> C <sub>12</sub> im]PF <sub>6</sub>   |      |      |      |      |      |      |      |      |
| resorcinol                                           | 12.9 | 12.8 | 13.0 | 13.1 | 13.0 | 13.1 | 12.8 | 6.89 |
| phenol                                               | 63.8 | 64.5 | 63.5 | 65.2 | 66.1 | 66.2 | 65.9 | 24.3 |
| guaiacol                                             | 74.3 | 74.2 | 74.3 | 73.0 | 75.4 | 74.9 | 75.0 | 43.7 |
| <i>p</i> -nitrophenol                                | 82.7 | 80.8 | 82.5 | 83.2 | 82.5 | 52.7 | 44.2 | 34.6 |
| <i>o</i> -cresol                                     | 83.3 | 83.7 | 83.3 | 83.1 | 85.2 | 86.1 | 85.4 | 51.1 |
| [C <sub>4</sub> C <sub>12</sub> im]BF <sub>4</sub>   |      |      |      |      |      |      |      |      |
| resorcinol                                           | 68.9 | 69.0 | 68.5 | 70.3 | 69.1 | 69.2 | 68.8 | 29.3 |
| phenol                                               | 85.0 | 83.9 | 83.2 | 84.3 | 86.2 | 84.9 | 85.4 | 47.0 |
| guaiacol                                             | 83.7 | 83.4 | 83.7 | 84.1 | 84.7 | 84.3 | 84.3 | 49.4 |
| <i>p</i> -nitrophenol                                | 93.9 | 94.2 | 93.9 | 95.3 | 96.2 | 89.0 | 84.8 | 83.1 |
| <i>o</i> -cresol                                     | 93.5 | 93.7 | 92.7 | 93.7 | 94.1 | 94.7 | 92.2 | 81.2 |
| [C <sub>4</sub> C <sub>11</sub> OHim]PF <sub>6</sub> |      |      |      |      |      |      |      |      |
| resorcinol                                           | 55.8 | 55.5 | 56.3 | 56.0 | 57.2 | 55.4 | 55.3 | 27.7 |
| phenol                                               | 79.6 | 79.2 | 79.0 | 79.0 | 80.0 | 79.6 | 78.8 | 42.6 |
| guaiacol                                             | 83.3 | 83.1 | 82.9 | 82.7 | 83.7 | 83.3 | 83.1 | 43.9 |
| <i>p</i> -nitrophenol                                | 94.4 | 94.4 | 94.3 | 94.2 | 94.9 | 56.9 | 55.1 | 45.3 |
| <i>o</i> -cresol                                     | 91.0 | 91.2 | 90.8 | 90.7 | 91.2 | 91.3 | 91.1 | 65.5 |
| [C <sub>4</sub> C <sub>11</sub> OHim]BF <sub>4</sub> |      |      |      |      |      |      |      |      |
| resorcinol                                           | 80.2 | 80.4 | 80.0 | 79.9 | 80.6 | 79.0 | 77.7 | 36.7 |
| phenol                                               | 86.5 | 86.3 | 86.5 | 86.5 | 87.0 | 86.9 | 86.4 | 48.0 |
| guaiacol                                             | 85.6 | 85.5 | 85.3 | 85.4 | 86.0 | 86.1 | 85.7 | 49.9 |
| <i>p</i> -nitrophenol                                | 96.7 | 96.8 | 96.7 | 96.7 | 96.8 | 87.2 | 85.3 | 85.5 |
| <i>o</i> -cresol                                     | 93.9 | 93.9 | 94.0 | 93.9 | 94.1 | 94.3 | 94.2 | 85.0 |
| [C <sub>4</sub> Beim]BF <sub>4</sub>                 |      |      |      |      |      |      |      |      |
| resorcinol                                           | 55.7 | 55.4 | 54.4 | 53.5 | 54.4 | 54.6 | 54.7 | 21.8 |
| phenol                                               | 72.9 | 72.8 | 71.7 | 72.3 | 74.9 | 74.0 | 74.9 | 42.1 |
| guaiacol                                             | 80.6 | 80.6 | 79.7 | 80.1 | 79.9 | 78.3 | 78.1 | 46.4 |
| <i>p</i> -nitrophenol                                | 89.8 | 89.9 | 89.6 | 89.4 | 87.9 | 68.9 | 71.4 | 70.5 |
| <i>o</i> -cresol                                     | 87.3 | 87.3 | 86.8 | 85.5 | 86.6 | 87.4 | 87.6 | 72.9 |

Table S1. Continued.

| pH                                                    | 2.0  | 3.0  | 5.0  | 6.0  | 7.0  | 9.0  | 10   | 12   |
|-------------------------------------------------------|------|------|------|------|------|------|------|------|
| [C <sub>8</sub> mim]NTf <sub>2</sub>                  |      |      |      |      |      |      |      |      |
| resorcinol                                            | 11.8 | 11.6 | 12.0 | 11.9 | 12.2 | 11.7 | 12.4 | 5.6  |
| phenol                                                | 67.4 | 66.4 | 66.4 | 66.8 | 67.6 | 66.0 | 64.7 | 4.3  |
| guaiacol                                              | 80.2 | 79.4 | 79.4 | 80.0 | 80.4 | 79.5 | 69.6 | 6.6  |
| <i>p</i> -nitrophenol                                 | 80.5 | 79.8 | 80.1 | 78.6 | 77.2 | 4.1  | 4.0  | 4.0  |
| <i>o</i> -cresol                                      | 85.7 | 85.1 | 85.2 | 85.4 | 86.1 | 85.8 | 81.4 | 11.5 |
| [C <sub>4</sub> C <sub>7</sub> im]NTf <sub>2</sub>    |      |      |      |      |      |      |      |      |
| resorcinol                                            | 10.1 | 10.6 | 11.2 | 11.4 | 11.1 | 10.3 | 10.0 | 4.9  |
| phenol                                                | 63.9 | 63.9 | 64.5 | 63.9 | 64.0 | 63.8 | 62.6 | 3.5  |
| guaiacol                                              | 77.9 | 77.8 | 78.3 | 77.7 | 78.4 | 77.6 | 76.0 | 2.4  |
| <i>p</i> -nitrophenol                                 | 77.9 | 77.7 | 77.7 | 76.2 | 75.6 | 6.0  | 0.3  | 4.6  |
| <i>o</i> -cresol                                      | 85.0 | 84.7 | 85.1 | 84.8 | 85.3 | 85.3 | 82.0 | 9.0  |
| [C <sub>4</sub> C <sub>9</sub> im] NTf <sub>2</sub>   |      |      |      |      |      |      |      |      |
| resorcinol                                            | 11.3 | 11.0 | 11.8 | 11.5 | 11.2 | 10.8 | 11.6 | 2.4  |
| phenol                                                | 62.5 | 62.4 | 62.9 | 63.4 | 64.2 | 64.1 | 62.3 | 10.8 |
| guaiacol                                              | 75.1 | 75.1 | 76.2 | 76.2 | 77.0 | 76.7 | 74.6 | 7.8  |
| <i>p</i> -nitrophenol                                 | 73.6 | 75.2 | 77.2 | 77.7 | 76.0 | 22.6 | 10.0 | 5.9  |
| <i>o</i> -cresol                                      | 82.1 | 83.2 | 84.1 | 84.2 | 85.2 | 86.4 | 86.7 | 13.6 |
| [C <sub>4</sub> C <sub>12</sub> im]NTf <sub>2</sub>   |      |      |      |      |      |      |      |      |
| resorcinol                                            | 9.2  | 9.0  | 8.9  | 9.1  | 8.7  | 8.8  | 9.0  | 2.3  |
| phenol                                                | 60.0 | 59.8 | 58.5 | 60.2 | 59.6 | 59.9 | 48.3 | 4.0  |
| guaiacol                                              | 75.2 | 74.8 | 73.8 | 74.8 | 74.1 | 73.8 | 69.8 | 3.6  |
| <i>p</i> -nitrophenol                                 | 73.3 | 72.7 | 73.8 | 75.5 | 74.6 | 48.0 | 13.2 | 11.2 |
| <i>o</i> -cresol                                      | 83.1 | 82.7 | 82.6 | 82.6 | 82.6 | 83.6 | 81.4 | 9.5  |
| [C <sub>4</sub> C <sub>6</sub> OHim]NTf <sub>2</sub>  |      |      |      |      |      |      |      |      |
| resorcinol                                            | 48.3 | 47.5 | 49.6 | 50.3 | 50.5 | 50.3 | 48.4 | 10.3 |
| phenol                                                | 78.3 | 77.9 | 78.6 | 78.9 | 80.5 | 81.0 | 79.3 | 4.2  |
| guaiacol                                              | 84.4 | 83.8 | 84.1 | 84.3 | 85.5 | 86.1 | 83.9 | 7.3  |
| <i>p</i> -nitrophenol                                 | 89.6 | 89.2 | 88.8 | 88.2 | 86.8 | 25.7 | 10.5 | 10.0 |
| <i>o</i> -cresol                                      | 90.5 | 90.2 | 90.5 | 90.6 | 91.7 | 92.5 | 92.1 | 31.9 |
| [C <sub>4</sub> C <sub>8</sub> OHim]NTf <sub>2</sub>  |      |      |      |      |      |      |      |      |
| resorcinol                                            | 51.3 | 50.2 | 49.3 | 50.4 | 49.8 | 50.1 | 35.0 | 4.0  |
| phenol                                                | 80.0 | 81.2 | 81.2 | 82.4 | 81.8 | 82.4 | 79.3 | 3.8  |
| guaiacol                                              | 84.2 | 85.0 | 84.9 | 85.9 | 85.2 | 85.6 | 82.1 | 2.3  |
| <i>p</i> -nitrophenol                                 | 92.1 | 92.8 | 92.4 | 92.6 | 88.0 | 32.5 | 11.0 | 5.6  |
| <i>o</i> -cresol                                      | 91.3 | 91.7 | 91.7 | 92.3 | 92.0 | 92.6 | 91.7 | 13.9 |
| [C <sub>4</sub> C <sub>11</sub> OHim]NTf <sub>2</sub> |      |      |      |      |      |      |      |      |
| resorcinol                                            | 45.1 | 44.8 | 44.3 | 45.2 | 45.4 | 46.1 | 44.1 | 9.2  |
| phenol                                                | 79.4 | 78.4 | 78.7 | 78.3 | 79.1 | 73.8 | 73.6 | 2.4  |
| guaiacol                                              | 84.0 | 83.1 | 83.2 | 82.8 | 83.4 | 78.9 | 78.6 | 3.2  |
| <i>p</i> -nitrophenol                                 | 92.4 | 92.0 | 92.1 | 91.6 | 87.9 | 29.5 | 28.0 | 17.0 |
| <i>o</i> -cresol                                      | 91.5 | 90.8 | 90.9 | 90.8 | 91.2 | 89.5 | 90.0 | 17.8 |

**Table S1. Continued.**

| pH                    | 2.0                                   | 3.0  | 5.0  | 6.0  | 7.0  | 9.0  | 10   | 12   |
|-----------------------|---------------------------------------|------|------|------|------|------|------|------|
|                       | [C <sub>4</sub> Beim]NTf <sub>2</sub> |      |      |      |      |      |      |      |
| resorcinol            | 31.0                                  | 30.8 | 30.7 | 29.8 | 31.5 | 32.4 | 31.4 | 5.6  |
| phenol                | 74.7                                  | 74.9 | 75.1 | 75.7 | 75.0 | 74.3 | 76.0 | 9.7  |
| guaiacol              | 80.0                                  | 81.5 | 82.4 | 82.8 | 81.9 | 83.2 | 82.6 | 13.7 |
| <i>p</i> -nitrophenol | 89.2                                  | 89.7 | 90.7 | 90.9 | 88.2 | 28.7 | 2.8  | 2.0  |
| <i>o</i> -cresol      | 88.4                                  | 87.4 | 88.5 | 89.0 | 89.4 | 87.8 | 89.9 | 41.2 |

**Table S2. Extraction Efficiencies (*E*, %) of ILs after the Compensation of Their Soluble Losses in Water at pH 7.0 and  $V_w:V_{IL} = 10:1$  (average values,  $n = 3$ ).**

|                                                       | resorcinol | phenol | guaiacol | <i>p</i> -nitrophenol | <i>o</i> -cresol |
|-------------------------------------------------------|------------|--------|----------|-----------------------|------------------|
| [C <sub>8</sub> mim]PF <sub>6</sub>                   | 12.9       | 63.0   | 74.1     | 80.3                  | 83.3             |
| [C <sub>8</sub> mim]BF <sub>4</sub>                   | 73.9       | 85.1   | 86.1     | 95.4                  | 93.1             |
| [C <sub>4</sub> C <sub>6</sub> OHim]PF <sub>6</sub>   | 58.1       | 80.3   | 85.4     | 90.3                  | 89.6             |
| [C <sub>4</sub> C <sub>7</sub> im]PF <sub>6</sub>     | 13.1       | 63.5   | 73.5     | 79.2                  | 82.8             |
| [C <sub>4</sub> C <sub>7</sub> im]BF <sub>4</sub>     | 73.4       | 86.9   | 85.6     | 96.7                  | 94.6             |
| [C <sub>4</sub> C <sub>8</sub> OHim]PF <sub>6</sub>   | 58.8       | 80.7   | 85.1     | 89.1                  | 91.2             |
| [C <sub>4</sub> C <sub>8</sub> OHim]BF <sub>4</sub>   | 75.9       | 83.7   | 81.5     | 93.6                  | 91.4             |
| [C <sub>4</sub> C <sub>9</sub> im]PF <sub>6</sub>     | 13.2       | 65.9   | 75.4     | 82.4                  | 85.0             |
| [C <sub>4</sub> C <sub>9</sub> im]BF <sub>4</sub>     | 72.9       | 86.5   | 86.5     | 94.8                  | 95.0             |
| [C <sub>4</sub> C <sub>11</sub> OHim]PF <sub>6</sub>  | 55.3       | 79.7   | 82.0     | 93.5                  | 90.2             |
| [C <sub>4</sub> C <sub>11</sub> OHim]BF <sub>4</sub>  | 79.5       | 85.8   | 85.4     | 96.2                  | 93.7             |
| [C <sub>4</sub> C <sub>12</sub> im]PF <sub>6</sub>    | 12.8       | 64.1   | 73.8     | 82.6                  | 83.2             |
| [C <sub>4</sub> C <sub>12</sub> im]BF <sub>4</sub>    | 69.3       | 85.7   | 84.5     | 93.2                  | 94.9             |
| [C <sub>4</sub> Beim]BF <sub>4</sub>                  | 68.3       | 79.8   | 81.1     | 92.2                  | 90.0             |
| [C <sub>8</sub> mim]NTf <sub>2</sub>                  | 12.1       | 67.7   | 81.0     | 77.0                  | 86.4             |
| [C <sub>4</sub> C <sub>7</sub> im]NTf <sub>2</sub>    | 11.2       | 61.2   | 77.6     | 75.8                  | 82.3             |
| [C <sub>4</sub> C <sub>6</sub> OHim]NTf <sub>2</sub>  | 50.1       | 80.7   | 85.1     | 86.1                  | 91.4             |
| [C <sub>4</sub> C <sub>8</sub> OHim]NTf <sub>2</sub>  | 52.0       | 81.6   | 85.6     | 86.3                  | 92.2             |
| [C <sub>4</sub> C <sub>9</sub> im]NTf <sub>2</sub>    | 11.0       | 61.2   | 77.6     | 76.9                  | 82.3             |
| [C <sub>4</sub> C <sub>11</sub> OHim]NTf <sub>2</sub> | 48.6       | 80.1   | 84.7     | 87.5                  | 91.8             |
| [C <sub>4</sub> C <sub>12</sub> im]NTf <sub>2</sub>   | 8.9        | 59.8   | 74.5     | 75.1                  | 78.2             |
| [C <sub>4</sub> Beim]NTf <sub>2</sub>                 | 33.0       | 76.4   | 83.5     | 90.3                  | 89.2             |
